# Supplementary material for: Transforming evidence-based clinical guidelines into implementable clinical decision support services: the CAREPATH study for multimorbidity management
Source: Front Med (Lausanne). 2024 May 27;11:1386689. doi: 10.3389/fmed.2024.1386689 (PMC11163046; doi:10.3389/fmed.2024.1386689)
Supplement: Supplementary file 4 [file Table_4.XLSX]

## Sheet: Rules
RULE NO	CONTEXT	PURPOSE	TRIGGER	RULE DESCRIPTION	INPUT as Clinical Concepts	OUTPUT
CUD 1	Patient has atrial fibrillation and is on Vitamin K Antagonist (VKA) and does not have [DOAC] in his prescription list	Change drug	This CDS will be triggered by AICP during medication review	IF the patient has [Atrial Fibrillation] diagnosis yet AND is on [VKA] and does not have [DOAC] in his prescription list	Conditions *Atrial Fibrillation Mecications *Vitamin K Antagonist (VKA) *Direct Oral Anticoagulant (DOAC)	ACTIVITIES Consider change to DOAC (Card 1)
CUD 2	Patient has one of the following in his/her prescription list [Aspirin monotherapy, dual antiplatelet therapy (Dual combination of any of the [Acetylsalicylic acid, Clopidogrel, Ticagrelor, Prasugrel]), or oral anticoagulant (OAC) monotherapy]	Add drug	This CDS will be triggered by AICP during medication review	IF the patient has one of the following in his/her prescription list [Aspirin monotherapy, dual antiplatelet therapy (Dual combination of any of the [Acetylsalicylic acid, Clopidogrel, Ticagrelor, Prasugrel]), or oral anticoagulant (OAC) monotherapy] AND does not have [Proton Pump Inhibitor (PPI)] in his prescription list	Medications *Aspirin monotherapy *dual antiplatelet therapy (DAPT) * oral anticoagulant (OAC) *Proton Pump Inhibitor (PPI)	ACTIVITIES Consider prescribing Proton Pump Inhibitor (PPI) (Card 2)
CUD 3	Patient has Chronic Coronary Syndromes	Add drug	This CDS will be triggered by AICP during medication review	IF the patient has one of the following conditions [ Chronic Coronary Syndromes] AND does not have [Statin] in his prescription list	Conditions *Chronic Coronary Syndromes Mecications *Statin	ACTIVITIES Consider prescribing Statin (Card 3)
CUD 4	Patient has Chronic Coronary Syndromes is on Statin and has not achieved LDL goal	Add drug	This CDS will be triggered by AICP during medication review	IF the Patient has [Chronic Coronary Syndromes] AND on [Statin] AND does not have [ezetimibe] in his prescription list AND [LDL] >=70 mg/dL	Conditions *Chronic Coronary Syndromes Mecications *Statin *ezetimibe Observation *LDL-C	ACTIVITIES Consider prescribing ezetimibe (Card 4)
CUD 5	Patient has Chronic Coronary Syndromes is on Statin and at very high risk and has not achieved LDL-C goal on a maximum tolerated dose of statin and ezetimibe	Add drug	This CDS will be triggered by AICP during medication review	IF the Patient has [Chronic Coronary Syndromes] AND on [Statin] AND [ezetimibe] in his prescription list AND [LDL-C] >=70 mg/dL AND ((has [Stroke] and [one of the major atherosclerotic cardiovascular disease (coronary artery disease, carotid artery stenosis, peripheral artery disease, or atherosclerotic renal artery stenosis)]) OR (has [Stroke] and [multiple high-risk conditions (hypertension, di…	Conditions *Chronic Coronary Syndromes *Stroke *atherosclerotic cardiovascular disease *coronary artery disease *carotid artery stenosis *peripheral artery disease *atherosclerotic renal artery stenosis *hypertension *diabetes *dyslipidaemia *thromboembolic disease Mecications *Statin *Ezetimibe *PCSK9 inhibitor Observation *LDL-C	ACTIVITIES Consider prescribing PCSK9 inhibitor (Card 5)
CUD 6	Patient has Diabetes or Heart Failure or cardiovascular disease	Add drug	This CDS will be triggered by AICP during medication review	IF the patient has [Diabetes] OR [Heart Failure] OR [cardiovascular disease ( I25.1, I25.5, I25.9, I65.29, I70.1, I73.9, G45.9, G45.8, I67.82, I63.9)] AND does not have [sodium-glucose co-transporter 2 (SGLT2) inhibitors such as empagliflozin, canagliflozin, or dapagliflozin ] in his prescription list	Conditions *Diabetes *Heart Failure *Cardiovascular disease Mecications *Sodium-glucose co-transporter 2 (SGLT2) inhibitors *empagliflozin * canagliflozin *dapagliflozin	ACTIVITIES Consider prescribing Starting SGLT2 inhibitors (Card 6)
CUD 7	Patient has CKD and eGFR]>25ml/min	Add drug	This CDS will be triggered by AICP during medication review	IF the patient has [CKD] and [eGFR]>25ml/min AND does not have [dapagliflozin] in his prescription list	Conditions *Diabetes *Heart Failure *Cardiovascular disease Mecications *Sodium-glucose co-transporter 2 (SGLT2) inhibitors *empagliflozin * canagliflozin *dapagliflozin	ACTIVITIES Consider prescribing Starting SGLT2 inhibitors (dapagliflozin) (Card 7)
CUD 8	Patient does not have anticoagulation therapy	Add drug	This CDS will be triggered by AICP during medication review	IF the patient needs [acute immobilization (AICP)] and not [contraindication to anticoagulation] AND does not have [anticoagulation therapy] in his prescription list	Conditions *acute immobilization *Contraindication to anticoagulation Mecications *anticoagulation therapy	ACTIVITIES Consider prescribing Starting anticoagulation therapy (Card 8)
CUD 9	Patient has MCI or mild dementia	Avoid Drug	This CDS will be triggered by AICP during medication review	IF the patient [MCI] OR [mild dementia]	Conditions *MCI * mild dementia	ACTIVITIES Information about the use of aspirin (Card 9)

## Sheet: Clinical Concepts
CONDITIONS (Diagnosis and Symptoms)
Terms/concepts used in guidelines	Coding System	Code	Designation	Category	Possible Source
Atherosclerotic renal artery stenosis	ICD-10	I70.1	Atherosclerosis of renal artery	diagnosis	EHR via TIS/SIS (Physicians will be able to confirm/amend via AICP)
Atrial Fibrillation (AF)	ICD-10	I48	Atrial fibrillation and flutter	diagnosis	EHR via TIS/SIS (Physicians will be able to confirm/amend via AICP)
Carotid artery stenosis	ICD-10	I65.2	Occlusion and stenosis of carotid artery	diagnosis	EHR via TIS/SIS (Physicians will be able to confirm/amend via AICP)
Cardiovascular disease	ICD-10	I25.1	Atherosclerotic heart disease of native coronary artery	diagnosis	EHR via TIS/SIS (Physicians will be able to confirm/amend via AICP)
	ICD-10	I25.5	Ischaemic cardiomyopathy	diagnosis	EHR via TIS/SIS (Physicians will be able to confirm/amend via AICP)
	ICD-10	I25.9	Chronic ischaemic heart disease, unspecified	diagnosis	EHR via TIS/SIS (Physicians will be able to confirm/amend via AICP)
	ICD-10	I65.29	Occlusion and stenosis of unspecified carotid artery	diagnosis	EHR via TIS/SIS (Physicians will be able to confirm/amend via AICP)
	ICD-10	I70.1	Atherosclerosis of renal artery	diagnosis	EHR via TIS/SIS (Physicians will be able to confirm/amend via AICP)
	ICD-10	I73.9	Peripheral vascular disease, unspecified	diagnosis	EHR via TIS/SIS (Physicians will be able to confirm/amend via AICP)
	ICD-10	G45.9	Transient cerebral ischaemic attack, unspecified	diagnosis	EHR via TIS/SIS (Physicians will be able to confirm/amend via AICP)
	ICD-10	G45.8	Other transient cerebral ischaemic attacks and related syndromes	diagnosis	EHR via TIS/SIS (Physicians will be able to confirm/amend via AICP)
	ICD-10	I67.82	Cerebral ischemia	diagnosis	EHR via TIS/SIS (Physicians will be able to confirm/amend via AICP)
	ICD-10	I63.9	Cerebral infarction, unspecified	diagnosis	EHR via TIS/SIS (Physicians will be able to confirm/amend via AICP)
Chronic Coronary Syndromes	ICD-10	I25.1	Atherosclerotic heart disease of native coronary artery	diagnosis	EHR via TIS/SIS (Physicians will be able to confirm/amend via AICP)
Chronic kidney disease	ICD-10	N18	Chronic kidney disease	diagnosis	EHR via TIS/SIS (Physicians will be able to confirm/amend via AICP)
	ICD-10	N18.1	Chronic kidney disease, stage 1	diagnosis	EHR via TIS/SIS (Physicians will be able to confirm/amend via AICP)
	ICD-10	N18.2	Chronic kidney disease, stage 2	diagnosis	EHR via TIS/SIS (Physicians will be able to confirm/amend via AICP)
	ICD-10	N18.3	Chronic kidney disease, stage 3	diagnosis	EHR via TIS/SIS (Physicians will be able to confirm/amend via AICP)
	ICD-10	N18.4	Chronic kidney disease, stage 4	diagnosis	EHR via TIS/SIS (Physicians will be able to confirm/amend via AICP)
	ICD-10	N18.5	Chronic kidney disease, stage 5	diagnosis	EHR via TIS/SIS (Physicians will be able to confirm/amend via AICP)
	ICD-10	N18.9	Chronic kidney disease, unspecified	diagnosis	EHR via TIS/SIS (Physicians will be able to confirm/amend via AICP)
	ICD-10	I12.0	Hypertensive renal disease with renal failure	diagnosis	EHR via TIS/SIS (Physicians will be able to confirm/amend via AICP)
	ICD-10	I13.1	Hypertensive heart and renal disease with renal failure	diagnosis	EHR via TIS/SIS (Physicians will be able to confirm/amend via AICP)
	ICD-10	N19	Unspecified kidney failure	diagnosis	EHR via TIS/SIS (Physicians will be able to confirm/amend via AICP)
Coronary artery disease	ICD-10	I25	Chronic ischaemic heart disease	diagnosis	EHR via TIS/SIS (Physicians will be able to confirm/amend via AICP)
Diabetes	ICD-10	E11-E14	Type 2 diabetes mellitus	diagnosis	EHR via TIS/SIS (Physicians will be able to confirm/amend via AICP)
Dyslipidaemia	ICD-10	E78.5	Hyperlipidemia, unspecified	diagnosis	EHR via TIS/SIS (Physicians will be able to confirm/amend via AICP)
Heart failure	ICD-10	I50	Heart failure	diagnosis	EHR via TIS/SIS (Physicians will be able to confirm/amend via AICP)
	ICD-10	I11	Hypertensive heart disease	diagnosis	EHR via TIS/SIS (Physicians will be able to confirm/amend via AICP)
	ICD-10	I13.0	Hypertensive heart and chronic kidney disease with heart failure and stage 1 through stage 4 chronic kidney disease, or unspecified chronic kidney disease	diagnosis	EHR via TIS/SIS (Physicians will be able to confirm/amend via AICP)
	ICD-10	I13.2	Hypertensive heart and chronic kidney disease with heart failure and with stage 5 chronic kidney disease, or end stage renal disease	diagnosis	EHR via TIS/SIS (Physicians will be able to confirm/amend via AICP)
	ICD-10	I26.0	Pulmonary embolism with acute cor pulmonale	diagnosis	EHR via TIS/SIS (Physicians will be able to confirm/amend via AICP)
Hypertension	ICD-10	I10 - I16	Hypertensive diseases	diagnosis	EHR via TIS/SIS (Physicians will be able to confirm/amend via AICP)
MCI	ICD-10	G31.84	Mild cognitive impairment	diagnosis	EHR via TIS/SIS (Physicians will be able to confirm/amend via AICP)
Mild dementia	SNOMED CT	428051000124108	Mild dementia	diagnosis	EHR via TIS/SIS (Physicians will be able to confirm/amend via AICP)
Peripheral artery disease	ICD-10	I73.9	Peripheral vascular disease, unspecified	diagnosis	EHR via TIS/SIS (Physicians will be able to confirm/amend via AICP)
Stroke	ICD-10	I63	Cerebral infarction	diagnosis	EHR via TIS/SIS (Physicians will be able to confirm/amend via AICP)
	ICD-10	I64	Stroke, not specified as haemorrhage or infarction?	diagnosis	EHR via TIS/SIS (Physicians will be able to confirm/amend via AICP)
Thromboembolic disease	ICD-10	I74.9	Embolism and thrombosis of unspecified artery	diagnosis	EHR via TIS/SIS (Physicians will be able to confirm/amend via AICP)
OBSERVATIONS (Lab tests, Vital Signs)
Terms/concepts used in guidelines	Coding System	Code	Designation	Unit	Possible Source
eGFR	LOINC	33914-3	Glomerular filtration rate/1.73 sq M.predicted [Volume Rate/Area] in Serum or Plasma by Creatinine-based formula (MDRD)	mL/min/{1.73_m2}	EHR via TIS/SIS (Physicians will be able to confirm/amend via AICP)
LDL	LOINC	2089-1	Cholesterol in LDL [Mass/volume] in Serum or Plasma by calculation	mg/dL	EHR via TIS/SIS (Physicians will be able to confirm/amend via AICP)
OBSERVATIONS (Assessments)
Terms/concepts used in guidelines	Coding System	Code	Designation	Unit	Possible Source
Need for acute immobilization	http://kroniq.srdc.com.tr/fhir/CodeSystem/observation-code	need-for-acute-immobilization	Need for acute immobilization	Yes/No	AICP
Contraindication to anticoagulation	http://kroniq.srdc.com.tr/fhir/CodeSystem/observation-code	contraindication-to-anticoagulation	Contraindication to anticoagulation	Yes/No	AICP
MEDICATIONS
Terms/concepts used in guidelines	Coding System	Code	Designation		Possible Source
Aspirin	ATC	N02BA01	Acetylsalicylic acid		EHR via TIS/SIS (Physicians will be able to confirm/amend via AICP)
Clopidogrel	ATC	B01AC04	Clopidogrel		EHR via TIS/SIS (Physicians will be able to confirm/amend via AICP)
Dapagliflozin	ATC	A10BK01	Dapagliflozin		EHR via TIS/SIS (Physicians will be able to confirm/amend via AICP)
Direct Oral Anticoagulant (DOAC)	ATC	B01AF	Direct factor Xa inhibitors		EHR via TIS/SIS (Physicians will be able to confirm/amend via AICP)
	ATC	B01AF02	Apixaban		EHR via TIS/SIS (Physicians will be able to confirm/amend via AICP)
	ATC	B01AE07	Dabigatran		EHR via TIS/SIS (Physicians will be able to confirm/amend via AICP)
	ATC	B01AF01	Rivaroxaban		EHR via TIS/SIS (Physicians will be able to confirm/amend via AICP)
	ATC	B01AF03	Edoxaban		EHR via TIS/SIS (Physicians will be able to confirm/amend via AICP)
Ezetimibe	ATC	C10AX09	Ezetimibe		EHR via TIS/SIS (Physicians will be able to confirm/amend via AICP)
Oral anticoagulant (OAC)	ATC	B01AF	Direct factor Xa inhibitors		EHR via TIS/SIS (Physicians will be able to confirm/amend via AICP)
	ATC	B01AA	Vitamin K antagonists		EHR via TIS/SIS (Physicians will be able to confirm/amend via AICP)
	ATC	B01AA03	Acenocumarol		EHR via TIS/SIS (Physicians will be able to confirm/amend via AICP)
PCSK9 inhibitor	ATC	C10AX13	Evolocumab		EHR via TIS/SIS (Physicians will be able to confirm/amend via AICP)
	ATC	C10AX14	Alirocumab		EHR via TIS/SIS (Physicians will be able to confirm/amend via AICP)
	ATC	C10AX16	Inclisiran		EHR via TIS/SIS (Physicians will be able to confirm/amend via AICP)
Proton Pump Inhibitor (PPI)	ATC	A02BC	Proton pump inhibitors		EHR via TIS/SIS (Physicians will be able to confirm/amend via AICP)
Prasugrel	ATC	B01AC22	Prasugrel		EHR via TIS/SIS (Physicians will be able to confirm/amend via AICP)
SGLT2 inhibitors	ATC	A10BK	SGLT-2 inhibitor		EHR via TIS/SIS (Physicians will be able to confirm/amend via AICP)
	ATC	A10BK03	Empagliflozin		EHR via TIS/SIS (Physicians will be able to confirm/amend via AICP)
	ATC	A10BK02	Canagliflozin		EHR via TIS/SIS (Physicians will be able to confirm/amend via AICP)
	ATC	A10BK01	Dapagliflozin		EHR via TIS/SIS (Physicians will be able to confirm/amend via AICP)
Statin	ATC	C10AA	Statins		EHR via TIS/SIS (Physicians will be able to confirm/amend via AICP)
	ATC	C10AA01	Simvastatin		EHR via TIS/SIS (Physicians will be able to confirm/amend via AICP)
	ATC	C10AA02	Lovastatin		EHR via TIS/SIS (Physicians will be able to confirm/amend via AICP)
	ATC	C10AA03	Pravastatin		EHR via TIS/SIS (Physicians will be able to confirm/amend via AICP)
	ATC	C10AA04	Fluvastatin		EHR via TIS/SIS (Physicians will be able to confirm/amend via AICP)
	ATC	C10AA05	Atorvastatin		EHR via TIS/SIS (Physicians will be able to confirm/amend via AICP)
	ATC	C10AA06	Cerivastatin		EHR via TIS/SIS (Physicians will be able to confirm/amend via AICP)
	ATC	C10AA07	Rosuvastatin		EHR via TIS/SIS (Physicians will be able to confirm/amend via AICP)
	ATC	C10AA08	Pitavastatin		EHR via TIS/SIS (Physicians will be able to confirm/amend via AICP)
Ticagrelor	ATC	B01AC24	Ticagrelor		EHR via TIS/SIS (Physicians will be able to confirm/amend via AICP)
Vitamin K Antagonist (VKA)	ATC	B01AA	Vitamin K antagonists		EHR via TIS/SIS (Physicians will be able to confirm/amend via AICP)

## Sheet: CDSHookCards
CARD 1
Summary			Consider changing to DOAC.
Detailed description			When oral anticoagulation is initiated in a patient with atrial fibrillation (AF) who is eligible for a direct oral anticoagulant (DOAC), a DOAC is recommended in preference to a vitamin K antagonist (VKA). In patients who are eligible for a DOAC, apixaban 2.5/5 mg b.i.d., dabigatran 110/150 mg b.i.d., rivaroxaban 15/20 mg o.d., or edoxaban 30/60 mg o.d. should be offered based on age, renal func…
Source			Holistic patient-centred CAREPATH best practice guideline, Chapter 8.1.1, [pp. 30]
			Link to CarePATH best practice guideline
CARD 2
Summary			Consider prescribing Proton Pump Inhibitor (PPI).
Detailed description			Concomitant use of a proton pump inhibitor is recommended in patients receiving aspirin monotherapy, dual antiplatelet therapy, or oral anticoagulant monotherapy, who are at high risk of gastrointestinal bleeding.
Source			Holistic patient-centred CAREPATH best practice guideline, Chapter 8.1.1, [pp. 30]
			Link to CarePATH best practice guideline
CARD 3
Summary			Consider prescribing Statins.
Detailed description			Statins are recommended in all patients, regardless of age, for the secondary prevention of cardiovascular events in patients with chronic coronary syndromes.
Source			Holistic patient-centred CAREPATH best practice guideline, Chapter 8.1.1, [pp. 30]
			Link to CarePATH best practice guideline
CARD 4
Summary			Consider prescribing Ezetimibe.
Detailed description			If a patient’s goal is not achieved with the maximum tolerated dose of statin, combination with ezetimibe is recommended.
Source			Holistic patient-centred CAREPATH best practice guideline, Chapter 8.1.1, [pp. 30]
			Link to CarePATH best practice guideline
CARD 5
Summary			Consider prescribing PCSK9 inhibitor.
Detailed description			For patients at very high risk who do not achieve their goal on a maximum tolerated dose of statin and ezetimibe, combination with a PCSK9 inhibitor is recommended. Very high risk is defined as: 1. Stroke plus another major atherosclerotic cardiovascular disease (coronary artery disease, carotid artery stenosis, peripheral artery disease, or atherosclerotic renal artery stenosis) or 2. Stroke plu…
Source			Holistic patient-centred CAREPATH best practice guideline, Chapter 8.1.1, [pp. 30]
			Link to CarePATH best practice guideline
CARD 6
Summary			Consider starting SGLT2 inhibitors.
Detailed description			The sodium-glucose co-transporter 2 inhibitors (SGLT2) empagliflozin, canagliflozin, or dapagliflozin are recommended in patients with diabetes and/or cardiovascular disease.
Source			Holistic patient-centred CAREPATH best practice guideline, Chapter 8.1.1, [pp. 31]
			Link to CarePATH best practice guideline
CARD 7
Summary			Consider starting SGLT2 inhibitors (dapagliflozin).
Detailed description			Dapagliflozin as a sodium-glucose co-transporter 2 inhibitors (SGLT2) is recommended in patients with CKD (with or without diabetes), but probably in the next months the four drugs will have this indication. Only indicated when glomerular filtration rate is > 25 ml/min, but if treatment was begun with this GFR, the drug can be maintained until dyalisis.
Source			Holistic patient-centred CAREPATH best practice guideline, Chapter 8.1.1, [pp. 31]
			Link to CarePATH best practice guideline
CARD 8
Summary			Consider prescribing anticoagulation therapy
Detailed description			In periods of immobilization, like during a hospitalization, thromboembolism prophylaxis, for instance with low molecular weight heparin, is recommended in patients not already anticoagulated and with no contraindication to anticoagulation, to reduce the risk of deep venous thrombosis and pulmonary embolism.
Source			Holistic patient-centred CAREPATH best practice guideline, Chapter 8.1.1, [ pp. 31]
			Link to CarePATH best practice guideline
CARD 9
Summary			Information about the use of aspirin.
Detailed description			The use of aspirin is not recommended for multimorbid older adults with MCI or mild dementia who have brain imaging evidence of covert white matter lesions of presumed vascular origin without history of stroke or brain infarcts.The effects of aspirin on cognitive decline in patients with MCI or dementia who have covert brain infarcts detected on neuroimaging without history of stroke has not been…
Source			Holistic patient-centred CAREPATH best practice guideline, Chapter 8.1.1, [pp. 30]
			Link to CarePATH best practice guideline
