# Supplementary material for: Transforming evidence-based clinical guidelines into implementable clinical decision support services: the CAREPATH study for multimorbidity management
Source: Front Med (Lausanne). 2024 May 27;11:1386689. doi: 10.3389/fmed.2024.1386689 (PMC11163046; doi:10.3389/fmed.2024.1386689)
Supplement: Supplementary file 5 [file Table_5.XLSX]

## Sheet: Rules
RULE NO	CONTEXT	PURPOSE	TRIGGER	RULE DESCRIPTION	INPUT as Clinical Concepts	OUTPUT
COPD 1, 2, 3	Patient does not have COPD diagnosis	Diagnosis	This CDS will be triggered by AICP during Care Plan is being created or updated	IF the patient does not have [COPD] diagnosis and ([Smoking] OR [history of smoking]) and [age>35] and has one of the following symptoms ([exertional dyspnea] OR [chronic cough] OR [regular sputum production] OR[frequent winter 'bronchitis'] OR [wheeze]) AND does not have a [FEV1/FVC] result in the past year.	Assesments: *Smoking Status Conditions: *Exertional dyspnea *Chronic Cough *Regular sputum production *Frequent winter bronchitis *Wheeze *COPD Demographics: *Age Observations: *FEV1/FVC	ACTIVITIES Suspect a diagnosis of COPD (Card 1) Notify the clinician that 'Suspect a diagnosis of Chronic Obstructive Pulmonary Disease (COPD) in older adults with multimorbidity and cognitive impairment when presenting a risk factor (generally smoking or a history of smoking) and one or more of the symptoms: exertional breathlessness, chronic cough, regular sputum production, frequent winter 'br…
COPD 4	Patient does not have COPD diagnosis	Diagnosis	This CDS will be triggered by AICP during Care Plan is being created or updated	IF the patient does not have [COPD] diagnosis and ([Smoking] OR [history of smoking]) and [age>35] and has one of the following symptoms ([exertional dyspnea] OR [chronic cough] OR [regular sputum production] OR[frequent winter 'bronchitis'] OR [wheeze]) AND has a [FEV1/FVC] result in the past year AND [FEV1/FVC ratio] <70 percent of the predicted value	Assesments: *Smoking Status Conditions: *Exertional dyspnea *Chronic Cough *Regular sputum production *Frequent winter bronchitis *Wheeze *COPD Demographics: *Age Observations: *FEV1/FVC	ACTIVITIES Consider COPD Diagnosis (Card 4) Recommend diagnosis (COPD)
COPD 5	Patient does not have COPD diagnosis	Diagnosis	This CDS will be triggered by AICP during Care Plan is being created or updated	IF the patient does not have [COPD] diagnosis and ([Smoking] OR [history of smoking]) and [age>35] and has one of the following symptoms ([exertional dyspnea] OR [chronic cough] OR [regular sputum production] OR[frequent winter 'bronchitis'] OR [wheeze]) AND has a [FEV1/FVC] result in the past year AND [FEV1/FVC ratio] >=70 percent of the predicted value	Assesments: *Smoking Status Conditions: *Exertional dyspnea *Chronic Cough *Regular sputum production *Frequent winter bronchitis *Wheeze *COPD Demographics: *Age Observations: *FEV1/FVC	ACTIVITIES Consider referral to Neumologist when there is diagnostic uncertainty (FEV1/FVC ratio ≥ 70%) (Card 5) -Notify the clinician that 'Refer older adults for specialist advice when there is diagnostic uncertainty' -Recommend Referral to Neumologist for confirming diagnosis and therapy optimization
COPD 6	Patient has a recent FEV1 measurement and COPD Diagnosis	COPD Severity	This CDS will be triggered by AICP during Care Plan is being created or updated	If the patient has [COPD] diagnosis and [FEV1] >= 80%	Conditions: *COPD Observations: *FEV1 (Ratio)	ACTIVITIES Consider setting COPD severity as Mild since FEV-1 ≥ 80%. (Card 6) Recommend setting [COPD Severity] as ‘Mild’
COPD 7	Patient has a recent FEV1 measurement and COPD Diagnosis	COPD Severity	This CDS will be triggered by AICP during Care Plan is being created or updated	If the patient has [COPD] diagnosis and [FEV1] is between 50-79%	Conditions: *COPD Observations: *FEV1 (Ratio)	ACTIVITIES Consider setting COPD severity as Moderate since FEV-1 is between 50% and 79%. (Card 7) Recommend setting [COPD Severity] as ‘Moderate’
COPD 8	Patient has a recent FEV1 measurement and COPD Diagnosis	COPD Severity	This CDS will be triggered by AICP during Care Plan is being created or updated	If the patient has [COPD] diagnosis and [FEV1] is between 30-49%	Conditions: *COPD Observations: *FEV1 (Ratio)	ACTIVITIES Consider setting COPD severity as Severe since FEV-1 is between 30% and 49%. (Card 8) Recommend setting [COPD Severity] as ‘Severe’
COPD 9	Patient has a recent FEV1 measurement and COPD Diagnosis	COPD Severity	This CDS will be triggered by AICP during Care Plan is being created or updated	If the patient has [COPD] diagnosis and [FEV1] <= 30%	Conditions: *COPD Observations: *FEV1 (Ratio)	ACTIVITIES Consider setting COPD severity as Very severe since FEV-1 ≤ 30% (Card 9) Recommend setting [COPD Severity] as ‘Very severe’
COPD 10	Patient has COPD Diagnosis	Assessment - General	This CDS will be triggered by AICP during Care Plan is being created or updated	IF the patient has [COPD]	Conditions: *COPD Symptoms: * ankle swelling * chest pain * fatigue * haemoptysis * occupational hazards * reduced exercise tolerance * waking at night with breathlessness * weight loss	ACTIVITIES Assess COPD symptoms (Card 10) Notify the clinician that ' Ask the person if they have: weight loss, reduced exercise tolerance, waking at night with breathlessness, ankle swelling, fatigue, occupational hazards, chest pain, or haemoptysis.'
COPD 11	Patient has COPD Diagnosis	Assessment - Questionnaire	This CDS will be triggered by AICP during Care Plan is being created or updated	IF the patient has [COPD]	Conditions *COPD Observation: * mMRC score	ACTIVITIES Fill in mMRC questionnaire to assess Dyspnoea scale of grading. (Card 11) Notify the clinician that 'Dyspnoea should be scaled following the next: * Grade 0: I only get breathless with strenuous exercise * Grade 1: I get short of breath when hurrying on level ground or walking up a slight hill * Grade 2: On level ground, I walk slower than people of the same age because of breathlessne…
COPD 12	Patient has COPD Diagnosis	Assessment - Prognosis	This CDS will be triggered by AICP during Care Plan is being created or updated	IF the patient has [COPD]	Observation: *FEV1 (Ratio) *BMI Assessments: *Smoking status *COPD Exacerbation Severity *Has there been two or more moderate exacerbations in the past 12 months? *Has there been at least one hospitalization because of exacerbations in the past 12 months? *Does the patient have supplemental oxygen use > 15 hours per day (Long-term oxygen therapy, LTOT)? *Does the patient need non-invasive ventila…	ACTIVITIES Assess the relevant factors associated with prognosis (Card 12) Notify the clinician that ' From diagnosis onwards, when discussing prognosis and treatment decisions with older adults with stable COPD, think about the following factors that are individually associated with prognosis: FEV, smoking status, breathlessness (MRC scale), chronic hypoxia and/or cor-pulmonale, low BMI, severit…
COPD 13	Patient has COPD Diagnosis and COPD Severity is Severe or Very severe	Referral Management	This CDS will be triggered by AICP during Care Plan is being created or updated	IF the patient has [COPD] AND [COPD severity] is 'Severe' or 'Very severe'	Conditions: *COPD Assessments: *COPD Severity	ACTIVITIES Consider Referral for therapy optimization when suspected severe COPD (Card 13) -Notify the clinician that 'Consider Referral to Neumologist for therapy optimization when suspected severe COPD. ' Recommend Referral (Neumologist) for therapy optimization.
COPD 14	Patient has COPD Diagnosis and cor-pulmonale	Referral Management	This CDS will be triggered by AICP during Care Plan is being created or updated	IF the patient has [COPD] AND [Cor-pulmonale]	Conditions: *COPD *Cor-pulmonale	ACTIVITIES Consider Referral for therapy optimization when onset of cor-pulmonale (Card 14) -Notify the clinician that 'Refer older adults for specialist advice for therapy optimization, when onset of cor-pulmonale' Recommend Referral (Cargiologist) for therapy optimization.
COPD 15	Patient has COPD	Referral Management	This CDS will be triggered by AICP during Care Plan is being created or updated	IF the patient has [COPD]	Conditions: *COPD	ACTIVITIES Consider Referral for detailed assessment (Card 15) -Notify the clinician that 'Refer older adults for specialist advice for assessment for oxygen therapy, or long-term nebuliser therapy, or need for continued treatment or supervise withdrawal.' -Recommend Referral for ‘assessment for oxygen therapy, or long-term nebuliser therapy, or need for continued treatment or supervise withdrawa…
COPD 16	Patient has COPD and several symptoms	Referral Management	This CDS will be triggered by AICP during Care Plan is being created or updated	IF the patient has [COPD] AND one of the following ([Cyanosis] OR [Polycythaemia] OR [Raised jugular venous pressure] OR [SaO2 <= 92%] OR [Pulmonary hypertension] OR [FEV1 below 30% predicted] OR [Peripheral oedema (swelling)])	Conditions & Symptoms: *COPD *Cyanosis *Peripheral oedema (swelling) *Polycythaemia *Pulmonary hypertension *Raised jugular venous pressure Observation *SaO2 *FEV1 ratio *Hemoglobin (Hb) *Hematocrit (Hct)	ACTIVITIES Consider Referral for detailed assessment of the need for oxygen therapy (Card 16) -Notify the clinician that 'Assess the need for oxygen therapy in people with very severe airflow obstruction (FEV1 below 30% predicted), cyanosis, polycythaemia, peripheral oedema (swelling), a raised jugular venous pressure, pulmonary hypertension, or an oxygen saturations of 92% or less breathing air.…
COPD 17	Patient has COPD	Referral Management	This CDS will be triggered by AICP during Care Plan is being created or updated	IF the patient has [COPD] an one of the following ([Respiratory acidosis] OR [Persistent hypoxemia despite adequate oxygen supply] OR [Severe dyspnoea with signs of respiratory muscle fatigue])	Conditions & Symptoms *COPD * Respiratory acidosis Assessments *Persistent hypoxemia despite adequate oxygen supply *Severe dyspnoea with signs of respiratory muscle fatigue Observations: *Blood pH *PaCO2	ACTIVITIES Consider Referral for detailed assessment of the need for Non-invasive mechanical ventilation (Card 17) -Notify the clinician that '* Consider Non-invasive mechanical ventilation when: a. Respiratory acidosis (pH ≤ 7.35 or partial pressure of carbon dioxide ≥45 mm Hg) b. Severe dyspnoea with signs of respiratory muscle fatigue such as use of accessory muscle, paradoxical motion of abdo…
COPD 18	Patient has COPD	Assessment for hospitilization	This CDS will be triggered by AICP during Care Plan is being created or updated	IF the patient has [COPD] AND ([Marked increase in intensity of symptoms] OR ([Patient has acute exacerbation characterised by increased dyspnoea, cough or sputum production] AND ( [Inadequate response to ambulatory management] OR [Inability to walk between rooms when previously mobile] OR [Inability to eat or sleep because of dyspnoea])) OR [Cannot manage at home even with home-care resources] O…	Conditions *COPD Assessments *Marked increase in intensity of symptoms *Patient has acute exacerbation characterised by increased dyspnoea, cough or sputum production *Inadequate response to ambulatory management *Inability to walk between rooms when previously mobile *Inability to eat or sleep because of dyspnoea *Cannot manage at home even with home-care resources *High risk co-morbidity condit…	ACTIVITIES Consider hospitalization (Card 18) -Notify the clinician that ' o Consider hospitalisation when: a. Marked increase in intensity of symptoms. b. Patient has acute exacerbation characterised by increased dyspnoea, cough or sputum production, plus one or more of the following: Inadequate response to ambulatory management, inability to walk between rooms when previously mobile, inability …
COPD 19	Patient has COPD and is not on (LABA or LAMA or ICS)	Medication Management	This CDS will be triggered by AICP during Care Plan is being created or updated	IF the patient has [COPD] and not on ([LABA] OR [LAMA] OR [ICS]) AND ([Does the patient have asthmatic features] OR [features suggesting steroid responsiveness]) AND ([Dyspnea] OR [have exacerbations despite optimized non-pharmacological management]) AND [Using a short-acting bronchodilator]	Conditions *COPD *Dyspnea Assessments *Does the patient have asthmatic features? *Does the patient have features suggesting steroid responsiveness? *Does the patient have exacerbations despite optimized non-pharmacological management? * Is the patient using a short-acting bronchodilator? Medications *LABA *LAMA *ICS *SABA	ACTIVITIES Consider offering LABA + ICS (Card 19) -Notify the clinician that 'Consider LABA + ICS (inhaled corticosteroids) for people who have asthmatic features or features suggesting steroid responsiveness and remain breathless or have exacerbations despite optimized non-pharmacological management and using a short-acting bronchodilator.'
COPD 20	Patient has COPD and is not on (LABA or LAMA or ICS)	Medication Management	This CDS will be triggered by AICP during Care Plan is being created or updated	IF the patient has [COPD] and not on ([LABA] OR [LAMA] OR [ICS]) AND NOT ([Does the patient have asthmatic features] OR [features suggesting steroid responsiveness]) AND ([Dyspnea] OR [have exacerbations despite optimized non-pharmacological management]) AND [Using a short-acting bronchodilator]	Conditions *COPD Assessments *Does the patient have asthmatic features? *Does the patient have features suggesting steroid responsiveness? *Does the patient have exacerbations despite optimized non-pharmacological management? * Is the patient using a short-acting bronchodilator? Medications *LABA *LAMA *ICS	ACTIVITIES Consider offering inhaled therapy with LAMA + LABA (Card 20) -Notify the clinician that 'In patients with stable COPD, offer inhaled therapy with LAMA (long-acting muscarinic antagonists) + LABA (long-acting β-2 agonists) if they do not have asthmatic features or features suggesting steroid responsiveness, and remain breathless or have exacerbations despite optimized non-pharmacologica…
COPD 21	Patient has COPD and is already on (LABA and ICS)	Medication Management	This CDS will be triggered by AICP during Care Plan is being created or updated	IF the patient has [COPD] AND is on ([LABA] and [ICS]) AND ([Symptoms adversely impact quality of life] OR [COPD Exacerbation Severity] is 'Severe' OR [At least one hospitalization because of exacerbations in the past 12 months] OR [Two or more moderate exacerbations in the past 12 months])	Conditions *COPD Assessments *Patient's day-to-day symptoms continue to adversely impact his/her quality of life *Patient has a severe exacerbation *Patient has at least one hospitalization because of exacerbations in the past 12 months *Patient has 2 moderate exacerbations within a year Medications *LABA *LAMA *ICS	ACTIVITIES Consider offerng LAMA + LABA + ICS (Card 21) -Notify the clinician that 'For people with COPD who are taking LABA + ICS, offer LAMA + LABA + ICS if their day-to-day symptoms continue to adversely impact their quality of life, or they have a severe exacerbation (requiring hospitalization), or they have 2 moderate exacerbations within a year. Before starting LAMA + LABA + ICS, conduct a …
COPD 23	Patient has COPD and is already on (LABA and LAMA)	Medication Management	This CDS will be triggered by AICP during Care Plan is being created or updated	IF the patient has [COPD] AND is on ([LAMA] and [LABA]) AND [Patient's day-to-day symptoms continue to adversely impact his/her quality of life]	Conditions *COPD Assessments *Patient's day-to-day symptoms continue to adversely impact his/her quality of life Medications *LABA *LAMA *ICS	ACTIVITIES Consider offering LAMA + LABA + ICS for three months and conduct a clinical review to establish whether or not LAMA + LABA.(Card 23) -Notify the clinician that 'For people with COPD who are taking LAMA + LABA and whose day-to-day symptoms adversely impact their quality of life, consider a trial of LAMA + LABA + ICS, lasting for 3 months. After 3 months, conduct a clinical review to est…
COPD 24	Patient has COPD and is already on (LABA and LAMA and ICS)	Medication Management	This CDS will be triggered by AICP during Care Plan is being created or updated	IF the patient has [COPD] and is on ([LABA] and [LAMA] and [ICS]) AND ([Symptoms adversely impact quality of life] OR [COPD Exacerbation Severity] is 'Severe' OR [At least one hospitalization because of exacerbations in the past 12 months] OR [Two or more moderate exacerbations in the past 12 months])	Conditions *COPD Assessments *Patient's day-to-day symptoms continue to adversely impact his/her quality of life *Patient has a severe exacerbation *Patient has at least one hospitalization because of exacerbations in the past 12 months *Patient has 2 moderate exacerbations within a year Medications *LABA *LAMA *ICS	ACTIVITIES Consider offering oral corticosteroid therapy (Card 24) -Notify the clinician that 'Long-term use of oral corticosteroid therapy in COPD is not normally recommended. Some patients with advanced COPD may need long-term oral corticosteroids when these cannot be withdrawn following an exacerbation. In these cases, the dose of oral corticosteroids should be kept as low as possible.' Consid…
COPD 25	Patient has COPD and is already on (LABA and LAMA and ICS)	Medication Management	This CDS will be triggered by AICP during Care Plan is being created or updated	IF the patient has [COPD] and is on ([LABA] and [LAMA] and [ICS]) AND NOT ([Symptoms adversely impact quality of life] OR [COPD Exacerbation Severity] is 'Severe' OR [At least one hospitalization because of exacerbations in the past 12 months] OR [Two or more moderate exacerbations in the past 12 months])	Conditions *COPD Assessments *Patient's day-to-day symptoms continue to adversely impact his/her quality of life *Patient has a severe exacerbation *Patient has at least one hospitalization because of exacerbations in the past 12 months *Patient has 2 moderate exacerbations within a year Medications *LABA *LAMA *ICS	ACTIVITIES Consider stopping ICS and continue with LAMA+ LABA (Card 25) -Notify the clinician that 'If symptoms have not improved, stop LAMA + LABA + ICS and switch back to LAMA + LABA' Consider assessing correct use of device (Card 27) -Notify the clinician that 'Assess the ability to use and the correct use of the device, consider an alternative device, if handling is not correct and cannot be …
COPD 26	Patient has COPD and is already on (LABA and LAMA and ICS)	Medication Management	This CDS will be triggered by AICP during Care Plan is being created or updated	IF the patient has [COPD] and is on ([LABA] and [LAMA] and [ICS]) AND ([Symptoms adversely impact quality of life] OR [COPD Exacerbation Severity] is 'Severe' OR [At least one hospitalization because of exacerbations in the past 12 months] OR [Two or more moderate exacerbations in the past 12 months])	Conditions *COPD Assessments *Patient's day-to-day symptoms continue to adversely impact his/her quality of life *Patient has a severe exacerbation *Patient has at least one hospitalization because of exacerbations in the past 12 months *Patient has 2 moderate exacerbations within a year Medications *LABA *LAMA *ICS	ACTIVITIES Consider continuing with LAMA + LABA + ICS (Card 26) -Notify the clinician that 'If symptoms have improved, continue with LAMA + LABA + ICS' Consider assessing correct use of device (Card 27) -Notify the clinician that 'Assess the ability to use and the correct use of the device, consider an alternative device, if handling is not correct and cannot be taught.'
COPD 28	Patient has COPD	Medication Management	This CDS will be triggered by AICP during Care Plan is being created or updated	IF the patient has [COPD]	Conditions *COPD	ACTIVITIES Guidance on use of nebulised therapy (Card 28) -Notify the clinician that 'Do not continue nebulised therapy without assessing and confirming that 1 or more of the following occurs: a reduction in symptoms, an increase in the ability to undertake activities of daily living, an increase in exercise capacity, or an improvement in lung function.'
COPD 29	Patient has COPD and dyspnea	Medication Management	This CDS will be triggered by AICP during Care Plan is being created or updated	IF the patient has [COPD] AND [dyspnoea]	Conditions *COPD *Dyspnoea	ACTIVITIES Consider starting opioids (Card 29) -Notify the clinician that 'Opioids (oral or parenteral) are effective therapy for the management of refractory dyspnoea and should be considered on an individual basis.
COPD 30	Patient has COPD and dyspnoea and (anxiety or depression)	Medication Management	This CDS will be triggered by AICP during Care Plan is being created or updated	IF the patient has [COPD] AND [dyspnoea] AND ([anxiety] OR [Depression] OR [GDS-4 Score ]>=2) )	Conditions *COPD *Anxiety *Depression *Dyspnoea Assessments *GDS-4 score	ACTIVITIES Consider starting Benzodiazepines, tricyclic anti-depressants, or major tranquilisers (Card 30) -Notify the clinician that 'Anxiety and depression accompany dyspnoea and should be evaluated and treated accordingly. Benzodiazepines, tricyclic anti-depressants, and major tranquilisers may be useful in this context.'
COPD 31	Patient has COPD and dyspnoea	Medication Management	This CDS will be triggered by AICP during Care Plan is being created or updated	IF the patient has [COPD] AND [dyspnoea]	Conditions *COPD * Dyspnoea	ACTIVITIES Consider oxygen therapy or fans for breathlessness (Card 31) -Notify the clinician that 'Oxygen and fans blowing air onto the face can relieve breathlessness’
COPD 32	Patient has COPD and fatigue	Medication Management	This CDS will be triggered by AICP during Care Plan is being created or updated	IF the patient has [COPD] AND [Fatique]	Conditions *COPD *Fatigue	ACTIVITIES Consider therapy for fatigue (Card 32) -Notify the clinician that 'Fatigue can be improved by self-management education, pulmonary rehabilitation, and mind-body interventions’ -Recommend assigning Education Material (COPD Self Management Education Material) to the patient -Recommend assigning Mind-Body Interventions to the patient -Reccomend Referral for pulmonary rehabilitation

## Sheet: Clinical Concepts
CONDITIONS (Diagnosis and Symptoms)
Terms/concepts used in guidelines	Coding System	Code	Designation	Category	Possible Source
Asthma	ICD-10	J45	Asthma	diagnosis	EHR via TIS/SIS (Physicians will be able to confirm/amend via AICP)
Chronic hypoxia	ICD-10	J96.11	Chronic respiratory failure with hypoxia	diagnosis	EHR via TIS/SIS (Physicians will be able to confirm/amend via AICP)
COPD	ICD-10	J44.9	Chronic obstructive pulmonary disease, unspecified	diagnosis	EHR via TIS/SIS (Physicians will be able to confirm/amend via AICP)
	ICD-10	J44.1	Chronic obstructive pulmonary disease with acute exacerbation, unspecified	diagnosis	EHR via TIS/SIS (Physicians will be able to confirm/amend via AICP)
	ICD-10	J44.89	Other specified chronic obstructive pulmonary disease:FEV1 unspecified	diagnosis	EHR via TIS/SIS (Physicians will be able to confirm/amend via AICP)
Cor pulmonale	ICD-10	I27.9	Pulmonary heart disease, unspecified	diagnosis	EHR via TIS/SIS (Physicians will be able to confirm/amend via AICP)
Cyanosis	ICD-10	R23.0	Cyanosis	diagnosis	EHR via TIS/SIS (Physicians will be able to confirm/amend via AICP)
Depression	ICD-10	F32.0	Mild depressive episode	diagnosis	EHR via TIS/SIS (Physicians will be able to confirm/amend via AICP)
	ICD-10	F32.1	Moderate depressive episode	diagnosis	EHR via TIS/SIS (Physicians will be able to confirm/amend via AICP)
	ICD-10	F32.2	Severe depressive episode without psychotic symptoms	diagnosis	EHR via TIS/SIS (Physicians will be able to confirm/amend via AICP)
	ICD-10	F32.8	Other depressive episodes	diagnosis	EHR via TIS/SIS (Physicians will be able to confirm/amend via AICP)
	ICD-10	F33.0	Recurrent depressive disorder, current episode mild	diagnosis	EHR via TIS/SIS (Physicians will be able to confirm/amend via AICP)
	ICD-10	F34.1	Dysthymia	diagnosis	EHR via TIS/SIS (Physicians will be able to confirm/amend via AICP)
	ICD-10	F41.2	Mixed anxiety and depressive disorder	diagnosis	EHR via TIS/SIS (Physicians will be able to confirm/amend via AICP)
Polycythaemia	ICD-10	D45	Polycythaemia	diagnosis	EHR via TIS/SIS (Physicians will be able to confirm/amend via AICP)
Pulmonary hypertension	ICD-10	I27.0	Primary pulmonary hypertension	diagnosis	EHR via TIS/SIS (Physicians will be able to confirm/amend via AICP)
Ankle swelling	http://kroniq.srdc.com.tr/fhir/CodeSystem/condition-code	ankle-swelling	Ankle swelling	symptom	EHR via TIS/SIS (Physicians will be able to confirm/amend via AICP)
Anxiety	ICD-10	F40	Phobic anxiety disorders	symptom	EHR via TIS/SIS (Physicians will be able to confirm/amend via AICP)
	ICD-10	F41	Other anxiety disorders	symptom	EHR via TIS/SIS (Physicians will be able to confirm/amend via AICP)
Chest pain	ICD-10	R07.9	chest pain unspecified	symptom	EHR via TIS/SIS (Physicians will be able to confirm/amend via AICP)
Chronic cough	ICD-10	R05.3	Chronic cough	symptom	EHR via TIS/SIS (Physicians will be able to confirm/amend via AICP)
Dyspnea	ICD-10	R06.0	Dyspnea	symptom	EHR via TIS/SIS (Physicians will be able to confirm/amend via AICP)
Exertional breathlessness	http://kroniq.srdc.com.tr/fhir/CodeSystem/condition-code	exertional-breathlessness	Exertional breathlessness	symptom	EHR via TIS/SIS (Physicians will be able to confirm/amend via AICP)
Fatigue	ICD-10	R53	Malaise and fatigue	symptom	EHR via TIS/SIS (Physicians will be able to confirm/amend via AICP)
Frequent winter bronchitis	http://kroniq.srdc.com.tr/fhir/CodeSystem/condition-code	frequent-winter-bronchitis	Frequent winter bronchitis	symptom	EHR via TIS/SIS (Physicians will be able to confirm/amend via AICP)
Haemoptysis	ICD-10	R04.2	Haemoptysis	symptom	EHR via TIS/SIS (Physicians will be able to confirm/amend via AICP)
Occupational hazards	http://kroniq.srdc.com.tr/fhir/CodeSystem/condition-code	occupational-hazards	Occupational hazards	symptom	EHR via TIS/SIS (Physicians will be able to confirm/amend via AICP)
Peripheral oedema	ICD-10	R60	Oedema, not elsewhere classified	symptom	EHR via TIS/SIS (Physicians will be able to confirm/amend via AICP)
Raised jugular venous pressure	http://kroniq.srdc.com.tr/fhir/CodeSystem/condition-code	raised-jugular-venous-pressure	Raised jugular venous pressure	symptom	EHR via TIS/SIS (Physicians will be able to confirm/amend via AICP)
Regular sputum production	ICD-10	R09.3	Abnormal sputum	symptom	EHR via TIS/SIS (Physicians will be able to confirm/amend via AICP)
Respiratory acidosis	ICD-10	E87.2	Acidosis	symptom	EHR via TIS/SIS (Physicians will be able to confirm/amend via AICP)
Reduced exercise tolerance	ICD-10	Z74.0	Reduced mobility	symptom	EHR via TIS/SIS (Physicians will be able to confirm/amend via AICP)
Waking at night with breathlessness	http://kroniq.srdc.com.tr/fhir/CodeSystem/condition-code	night-dyspnea	Waking at night with breathlessness	symptom	EHR via TIS/SIS (Physicians will be able to confirm/amend via AICP)
Wheeze	ICD-10	R06.2	Wheezing	symptom	EHR via TIS/SIS (Physicians will be able to confirm/amend via AICP)
Weight loss	ICD-10	R63.4	Abnormal weight loss	symptom	EHR via TIS/SIS (Physicians will be able to confirm/amend via AICP)
OBSERVATIONS (Lab tests, Vital Signs)
Terms/concepts used in guidelines	Coding System	Code	Designation	Unit	Possible Source
BMI	LOINC	39156-5	Body mass index (BMI) [Ratio]	kg/m2	EHR via TIS/SIS (Physicians will be able to confirm/amend via AICP)
FEV1 (ratio)	LOINC	20152-5	FEV1 measured/predicted	%	EHR via TIS/SIS (Physicians will be able to confirm/amend via AICP)
FEV1/FVC	LOINC	19926-5	FEV1/FVC	%	EHR via TIS/SIS (Physicians will be able to confirm/amend via AICP)
SaO2	LOINC	2708-6	Oxygen saturation in Arterial blood	%	EHR via TIS/SIS (Physicians will be able to confirm/amend via AICP)
Smoking status	LOINC	72166-2	Tobacco smoking status	(Smoking status values)	EHR via TIS/SIS (Physicians will be able to confirm/amend via AICP)
Blood pH	LOINC	11558-4	pH of Blood	[pH]	EHR via TIS/SIS (Physicians will be able to confirm/amend via AICP)
PaCO2	LOINC	2019-8	Carbon dioxide [Partial pressure] in Arterial blood	mm[Hg]	EHR via TIS/SIS (Physicians will be able to confirm/amend via AICP)
Hemoglobin	LOINC	4635-9	Hemoglobin Mass/volume in Serum	g/L, mg/dL	EHR via TIS/SIS (Physicians will be able to confirm/amend via AICP)
Hematocrit	LOINC	20570-8	Hematocrit [Volume Fraction] of Blood	%	EHR via TIS/SIS (Physicians will be able to confirm/amend via AICP)
OBSERVATIONS (Assessments)
Terms/concepts used in guidelines	Coding System	Code	Designation	Unit	Possible Source
6-minute walk test result	LOINC	64098-7	Six minute walk test	m/(6.min)	AICP
CAT Score	http://kroniq.srdc.com.tr/fhir/CodeSystem/questionnaire-code	cat	COPD Assessment Test Score	{score}	AICP
GDS-4	http://kroniq.srdc.com.tr/fhir/CodeSystem/questionnaire-code	gds-4	Geriatric Depression Scale (GDS-4)	{score}	AICP
mMRC Score	LOINC	98070-6	Medical Research Council breathlessness scale grade	{score}	AICP
COPD Severity	http://kroniq.srdc.com.tr/fhir/CodeSystem/observation-code	copd-severity	Severity of COPD	(COPD severity values)	AICP
COPD Exacerbation Severity	http://kroniq.srdc.com.tr/fhir/CodeSystem/observation-code	copd-exacerbation-severity	Severity of Exacerbations	(COPD Exacerbation Severity values)	AICP
Acute exacerbation characterised by increased dyspnoea, cough or sputum production	http://kroniq.srdc.com.tr/fhir/CodeSystem/observation-code	acute-exacerbations	Acute exacerbations	yes/no	AICP
Altered mental status suggestive of hypercapnia	http://kroniq.srdc.com.tr/fhir/CodeSystem/observation-code	altered-mental-status-suggestive-of-hypercapnia	Altered mental status suggestive of hypercapnia	yes/no	AICP
Asthmatic features	http://kroniq.srdc.com.tr/fhir/CodeSystem/observation-code	asthmatic-features	Asthmatic features	yes/no	AICP
At least one hospitalization because of exacerbations in the past 12 months	http://kroniq.srdc.com.tr/fhir/CodeSystem/observation-code	hospitilization-due-to-exacerbations	At least one hospitalization because of exacerbations in the past 12 months	yes/no	AICP
Cannot manage at home even with home-care resources	http://kroniq.srdc.com.tr/fhir/CodeSystem/observation-code	cannot-manage-at-home	Cannot manage at home	yes/no	AICP
Confusion, lethargy, or evidence of hypoventilation	http://kroniq.srdc.com.tr/fhir/CodeSystem/observation-code	confusion-lethargy-evidence-of-hypoventilation	Confusion, lethargy, or evidence of hypoventilation	yes/no	AICP
Exacerbations despite optimized non-pharmacological management and using a short-acting bronchodilator	http://kroniq.srdc.com.tr/fhir/CodeSystem/observation-code	exacerbation-despite-non-pharmacological-management-and-bronchodilator	Exacerbations despite optimized non-pharmacological management and using a short-acting bronchodilator	yes/no	AICP
Features suggesting steroid responsiveness	http://kroniq.srdc.com.tr/fhir/CodeSystem/observation-code	features-suggesting-steroid-responsiveness	Features suggesting steroid responsiveness	yes/no	AICP
High risk comorbidity condition	http://kroniq.srdc.com.tr/fhir/CodeSystem/observation-code	high-risk-comorbidity-condition	High risk comorbidity condition	yes/no	AICP
Inability to eat or sleep because of dyspnea	http://kroniq.srdc.com.tr/fhir/CodeSystem/observation-code	inability-eat-or-sleep-because-of-dyspnea	Inability to eat or sleep because of dyspnea	yes/no	AICP
Inability to walk between rooms when previously mobile	http://kroniq.srdc.com.tr/fhir/CodeSystem/observation-code	inability-to-walk-between-rooms	Inability to walk between rooms	yes/no	AICP
Inadequate response to ambulatory management	http://kroniq.srdc.com.tr/fhir/CodeSystem/observation-code	inadequate-response-to-ambulatory-management	Inadequate response to ambulatory management	yes/no	AICP
Long-term oxygen therapy (Supplemental oxygen use > 15 hours per day)	http://kroniq.srdc.com.tr/fhir/CodeSystem/observation-code	long-term-oxygen-therapy	Long-term oxygen therapy (Supplemental oxygen use > 15 hours per day)	yes/no	AICP
Marked increase in intensity of symptoms	http://kroniq.srdc.com.tr/fhir/CodeSystem/observation-code	increase-in-intensity-of-symptoms	Increase in intensity of symptoms	yes/no	AICP
Need for non-invasive ventilation	http://kroniq.srdc.com.tr/fhir/CodeSystem/observation-code	need-for-niv	Need for non-invasive ventilation	yes/no	AICP
Persistent hypoxemia despite adequate oxygen supply	http://kroniq.srdc.com.tr/fhir/CodeSystem/observation-code	persistent-hypoxemia	Persistent hypoxemia despite adequate oxygen supply	yes/no	AICP
Severe dyspnea that responds inadequately to initial emergency therapy.	http://kroniq.srdc.com.tr/fhir/CodeSystem/observation-code	severe-dyspnea-responds-inadequately-to-emergency-therapy	Severe dyspnea that responds inadequately to initial emergency therapy	yes/no	AICP
Severe dyspnoea with signs of respiratory muscle fatigue	http://kroniq.srdc.com.tr/fhir/CodeSystem/observation-code	severe-dyspnea-with-respiratory-muscle-fatigue	Severe dyspnea with signs of respiratory muscle fatigue	yes/no	AICP
Severe or worsening respiratory acidosis	http://kroniq.srdc.com.tr/fhir/CodeSystem/observation-code	severe-respiratory-acidosis	Severe or worsening respiratory acidosis	yes/no	AICP
Symptoms adversely impact quality of life	http://kroniq.srdc.com.tr/fhir/CodeSystem/observation-code	symptoms-adversely-impact-quality-of-life	Symptoms adversely impact quality of life	yes/no	AICP
Two or more moderate exacerbations in the past 12 months	http://kroniq.srdc.com.tr/fhir/CodeSystem/observation-code	more-than-two-moderate-exacerbations	Two or more moderate exacerbations in the past 12 months	yes/no	AICP
Using a short-acting bronchodilator	http://kroniq.srdc.com.tr/fhir/CodeSystem/observation-code	using-short-acting-bronchodilator	Using a short-acting bronchodilator	yes/no	AICP
Worsening hypercapnia	http://kroniq.srdc.com.tr/fhir/CodeSystem/observation-code	worsening-hypercapnia	Worsening hypercapnia	yes/no	AICP
Worsening hypoxemia or cor pulmonale	http://kroniq.srdc.com.tr/fhir/CodeSystem/observation-code	worsening-hypoxemia-or-corpulmonale	Worsening hypoxemia or cor pulmonale	yes/no	AICP
VALUE SETS
Value set name	Coding System	Code	Designation
Smoking status values	LOINC	LA18976-3	Current every day smoker
	LOINC	LA18977-1	Current some day smoker
	LOINC	LA15920-4	Former smoker
	LOINC	LA18978-9	Never smoker
	LOINC	LA18979-7	Smoker, current status unknown
	LOINC	LA18980-5	Unknown if ever smoked
	LOINC	LA18981-3	Current Heavy tobacco smoker
	LOINC	LA18982-1	Current Light tobacco smoker
COPD Exacerbation Severity values	http://kroniq.srdc.com.tr/fhir/CodeSystem/copd-exacerbation-severity	mild	Mild
	http://kroniq.srdc.com.tr/fhir/CodeSystem/copd-exacerbation-severity	moderate	Moderate
	http://kroniq.srdc.com.tr/fhir/CodeSystem/copd-exacerbation-severity	severe	Severe
COPD Severity Values	http://kroniq.srdc.com.tr/fhir/CodeSystem/copd-severity	1	Mild
	http://kroniq.srdc.com.tr/fhir/CodeSystem/copd-severity	2	Moderate
	http://kroniq.srdc.com.tr/fhir/CodeSystem/copd-severity	3	Severe
	http://kroniq.srdc.com.tr/fhir/CodeSystem/copd-severity	4	Very Severe
MEDICATIONS
Terms/concepts used in guidelines	Coding System	Code	Designation		Possible Source
Inhaled corticosteroids (ICS)	ATC	R03BA01	Beclometason	Beclometason	EHR via TIS/SIS (Physicians will be able to confirm/amend via AICP)
	ATC	R03BA02	Budesonid	Budesonid	EHR via TIS/SIS (Physicians will be able to confirm/amend via AICP)
	ATC	R03BA03	Flunisolid	Flunisolid	EHR via TIS/SIS (Physicians will be able to confirm/amend via AICP)
	ATC	R03BA05	Fluticason	Fluticason	EHR via TIS/SIS (Physicians will be able to confirm/amend via AICP)
	ATC	R03BA07	Mometason	Mometason	EHR via TIS/SIS (Physicians will be able to confirm/amend via AICP)
	ATC	R03BA08	Ciclesonid	Ciclesonid	EHR via TIS/SIS (Physicians will be able to confirm/amend via AICP)
	ATC	R03BA09	Fluticasonfuroat	Fluticasonfuroat	EHR via TIS/SIS (Physicians will be able to confirm/amend via AICP)
Long-Acting Muscarinic Antagonists (LAMA)	ATC	R03BB04	Tiotropiumbromid	Tiotropiumbromid	EHR via TIS/SIS (Physicians will be able to confirm/amend via AICP)
	ATC	R03BB05	Aclidiniumbromid	Aclidiniumbromid	EHR via TIS/SIS (Physicians will be able to confirm/amend via AICP)
	ATC	R03BB06	Glycopyrroniumbromid	Glycopyrroniumbromid	EHR via TIS/SIS (Physicians will be able to confirm/amend via AICP)
	ATC	R03BB07	Umeclidiniumbromid	Umeclidiniumbromid	EHR via TIS/SIS (Physicians will be able to confirm/amend via AICP)
	ATC	R03BB54	Tiotropiumbromid, Kombinationen	Tiotropiumbromid, Kombinationen	EHR via TIS/SIS (Physicians will be able to confirm/amend via AICP)
Long-Acting Bronchodilator Inhalers (LABA)	ATC	R03AC05	Rimiterol	Rimiterol	EHR via TIS/SIS (Physicians will be able to confirm/amend via AICP)
	ATC	R03AC06	Hexoprenalin	Hexoprenalin	EHR via TIS/SIS (Physicians will be able to confirm/amend via AICP)
	ATC	R03AC07	Isoetarin	Isoetarin	EHR via TIS/SIS (Physicians will be able to confirm/amend via AICP)
	ATC	R03AC08	Pirbuterol	Pirbuterol	EHR via TIS/SIS (Physicians will be able to confirm/amend via AICP)
	ATC	R03AC09	Tretoquinol	Tretoquinol	EHR via TIS/SIS (Physicians will be able to confirm/amend via AICP)
	ATC	R03AC10	Carbuterol	Carbuterol	EHR via TIS/SIS (Physicians will be able to confirm/amend via AICP)
	ATC	R03AC11	Tulobuterol	Tulobuterol	EHR via TIS/SIS (Physicians will be able to confirm/amend via AICP)
	ATC	R03AC12	Salmeterol	Salmeterol	EHR via TIS/SIS (Physicians will be able to confirm/amend via AICP)
	ATC	R03AC13	Formoterol	Formoterol	EHR via TIS/SIS (Physicians will be able to confirm/amend via AICP)
	ATC	R03AC14	Clenbuterol	Clenbuterol	EHR via TIS/SIS (Physicians will be able to confirm/amend via AICP)
	ATC	R03AC15	Reproterol	Reproterol	EHR via TIS/SIS (Physicians will be able to confirm/amend via AICP)
	ATC	R03AC16	Procaterol	Procaterol	EHR via TIS/SIS (Physicians will be able to confirm/amend via AICP)
	ATC	R03AC17	Bitolterol	Bitolterol	EHR via TIS/SIS (Physicians will be able to confirm/amend via AICP)
	ATC	R03AC18	Indacaterol	Indacaterol	EHR via TIS/SIS (Physicians will be able to confirm/amend via AICP)
LABA+ICS	ATC	R03AK06	Salmeterol und Fluticason	Salmeterol und Fluticason	EHR via TIS/SIS (Physicians will be able to confirm/amend via AICP)
	ATC	R03AK07	Formoterol und Budesonid	Formoterol und Budesonid	EHR via TIS/SIS (Physicians will be able to confirm/amend via AICP)
	ATC	R03AK08	Formoterol und Beclometason	Formoterol und Beclometason	EHR via TIS/SIS (Physicians will be able to confirm/amend via AICP)
	ATC	R03AK09	Formoterol und Mometason	Formoterol und Mometason	EHR via TIS/SIS (Physicians will be able to confirm/amend via AICP)
	ATC	R03AK10	Vilanterol und Fluticasonfuroat	Vilanterol und Fluticasonfuroat	EHR via TIS/SIS (Physicians will be able to confirm/amend via AICP)
	ATC	R03AK11	Formoterol und Fluticason	Formoterol und Fluticason	EHR via TIS/SIS (Physicians will be able to confirm/amend via AICP)
	ATC	R03AK12	Salmeterol und Budesonid	Salmeterol und Budesonid	EHR via TIS/SIS (Physicians will be able to confirm/amend via AICP)
	ATC	R03AK13	Salbutamol und Beclometason	Salbutamol und Beclometason	EHR via TIS/SIS (Physicians will be able to confirm/amend via AICP)
	ATC	R03AK14	Indacaterol und Mometason	Indacaterol und Mometason	EHR via TIS/SIS (Physicians will be able to confirm/amend via AICP)
LABA+LAMA	ATC	R03AL03	Vilanterol und Umeclidiniumbromid	Vilanterol und Umeclidiniumbromid	EHR via TIS/SIS (Physicians will be able to confirm/amend via AICP)
	ATC	R03AL04	Indacaterol und Glycopyrroniumbromid	Indacaterol und Glycopyrroniumbromid	EHR via TIS/SIS (Physicians will be able to confirm/amend via AICP)
	ATC	R03AL05	Formoterol und Aclidiniumbromid	Formoterol und Aclidiniumbromid	EHR via TIS/SIS (Physicians will be able to confirm/amend via AICP)
	ATC	R03AL06	Olodaterol und Tiotropiumbromid	Olodaterol und Tiotropiumbromid	EHR via TIS/SIS (Physicians will be able to confirm/amend via AICP)
	ATC	R03AL07	Formoterol und Glycopyrroniumbromid	Formoterol und Glycopyrroniumbromid	EHR via TIS/SIS (Physicians will be able to confirm/amend via AICP)
	ATC	R03AL10	Formoterol und Tiotropiumbromid	Formoterol und Tiotropiumbromid	EHR via TIS/SIS (Physicians will be able to confirm/amend via AICP)
LABA+LAMA+ICS	ATC	R03AL08	Vilanterol, Umeclidiniumbromid und Fluticasonfuroat	Vilanterol, Umeclidiniumbromid und Fluticasonfuroat	EHR via TIS/SIS (Physicians will be able to confirm/amend via AICP)
	ATC	R03AL09	Formoterol, Glycopyrroniumbromid und Beclometason	Formoterol, Glycopyrroniumbromid und Beclometason	EHR via TIS/SIS (Physicians will be able to confirm/amend via AICP)
	ATC	R03AL11	Formoterol, Glycopyrroniumbromid und Budesonid	Formoterol, Glycopyrroniumbromid und Budesonid	EHR via TIS/SIS (Physicians will be able to confirm/amend via AICP)
	ATC	R03AL12	Indacaterol, Glycopyrroniumbromid und Mometason	Indacaterol, Glycopyrroniumbromid und Mometason	EHR via TIS/SIS (Physicians will be able to confirm/amend via AICP)
Short-acting beta2 agonists (SABA)	ATC	R03AC02	Salbutamol	Salbutamol	EHR via TIS/SIS (Physicians will be able to confirm/amend via AICP)
	ATC	R03AC03	Terbutalin	Terbutalin	EHR via TIS/SIS (Physicians will be able to confirm/amend via AICP)
	ATC	R03AC04	Fenoterol	Fenoterol	EHR via TIS/SIS (Physicians will be able to confirm/amend via AICP)
short-acting muscarinic antagonists (SAMA)	ATC	R03BB01	Ipratropium bromide	Ipratropium bromide	EHR via TIS/SIS (Physicians will be able to confirm/amend via AICP)
SABA+SAMA	ATC	R03AL01	Fenoterol and ipratropium bromide	Fenoterol and ipratropium bromide	EHR via TIS/SIS (Physicians will be able to confirm/amend via AICP)
	ATC	R03AL02	Salbutamol and ipratropium bromide	Salbutamol and ipratropium bromide	EHR via TIS/SIS (Physicians will be able to confirm/amend via AICP)
Systemic corticosteroid	ATC	R03BA04	Betamethasone	Betamethasone	EHR via TIS/SIS (Physicians will be able to confirm/amend via AICP)
	ATC	R03BA06	Triamcinolone	Triamcinolone	EHR via TIS/SIS (Physicians will be able to confirm/amend via AICP)
Oral corticosteroid	ATC	R03BA19	Dexamethason	Dexamethason	EHR via TIS/SIS (Physicians will be able to confirm/amend via AICP)
	ATC	S02BA	Corticosteroids	Corticosteroids	EHR via TIS/SIS (Physicians will be able to confirm/amend via AICP)
	ATC	S02BA01	Hydrocortisone	Hydrocortisone	EHR via TIS/SIS (Physicians will be able to confirm/amend via AICP)
	ATC	S02BA03	Prednisolone	Prednisolone	EHR via TIS/SIS (Physicians will be able to confirm/amend via AICP)
	ATC	R03BA01	Beclomatasone	Beclomatasone	EHR via TIS/SIS (Physicians will be able to confirm/amend via AICP)
	ATC	R03BA02	Budesonide	Budesonide	EHR via TIS/SIS (Physicians will be able to confirm/amend via AICP)

## Sheet: CDSHookCards
CARD 1
Summary			Suspect a diagnosis of COPD in older adults with multi-morbidity and cognitive impairment when presenting a risk factor and having one or more of the symptoms.
Detailed description			Suspect a diagnosis of Chronic Obstructive Pulmonary Disease (COPD) in older adults with multi-morbidity and cognitive impairment when presenting a risk factor (generally smoking or a history of smoking) and having one or more of the symptoms: exertional breathlessness, chronic cough, regular sputum production, frequent winter bronchitis, or wheeze.
Source			Holistic patient-centred CAREPATH best practice guideline, Chapter 15.1 [pp. 63]
			Link to CarePATH best practice guideline
CARD 2
Summary			Consider performing spirometry to confirm COPD diagnosis.
Detailed description			Spirometry should be performed at diagnosis to reconsider the diagnosis for people who show an exceptionally good response to treatment, and to monitor disease progression. Post-bronchodilator spirometry must be realized to confirm the diagnosis of COPD. However, in multi-morbid older adults with cognitive impairment, spirometry may be difficult to be realized, and results may not be accurate.
Source			Holistic patient-centred CAREPATH best practice guideline, Chapter 15.2 [pp. 64]
			Link to CarePATH best practice guideline
Suggestion 1
label	Consider ordering spirometry to confirm COPD diagnosis.
ACTION 1	type	create
	description	Consider ordering spirometry to confirm COPD diagnosis.
	resource	Service Request	status	draft
			extension	http://kroniq.srdc.com.tr/fhir/StructureDefinition/title | Spirometry test
			intent	proposal
			occuranceDateTime	{{Today}}
			category	http://www.kroniq.srdc.com.tr/fhir/care-plan-activity-category | lab-request | Lab Request
			code	LOINC | 81459-0 | Spirometry panel
			performerType	-
			performer	Patient
			text.status	generated
			text.div	Have a spirometry test for COPD diagnosis
CARD 3
Summary			Consider ordering chest radiograph and a full blood count at the time of initial diagnosis.
Detailed description			At the time of the initial diagnosis, all patients should have a chest radiograph to exclude other pathologies, a full blood count to identify anaemia or polycythaemia, and a Body Mass Index calculated.
Source			Holistic patient-centred CAREPATH best practice guideline, Chapter 15.2 [pp. 64]
			Link to CarePATH best practice guideline
Suggestion 1
label	Consider ordering chest radiograph and a full blood count.
ACTION 2	type	create
	description	Consider ordering chest radiograph to exclude other pathologies.
	resource	Service Request	status	draft
			extension	http://kroniq.srdc.com.tr/fhir/StructureDefinition/title | Chest radiograph test
			intent	proposal
			occuranceDateTime	{{Today}}
			category	http://www.kroniq.srdc.com.tr/fhir/care-plan-activity-category | lab-request | Lab Request
			code	SNOMED-CT | 168731009 | Standard chest X-ray
			performerType	-
			performer	Patient
			text.status	generated
			text.div	Have a chest radiograph to exclude other pathologies
ACTION 3	type	create
	description	Consider ordering a full blood count to identify anaemia or polycythaemia.
	resource	Service Request	status	draft
			extension	http://kroniq.srdc.com.tr/fhir/StructureDefinition/title | Full blood count
			intent	proposal
			occuranceDateTime	{{Today+1 month}}
			category	http://www.kroniq.srdc.com.tr/fhir/care-plan-activity-category | lab-request | Lab Request
			code	LOINC | 58410-2 | CBC panel - Blood by Automated count
			performerType	-
			performer	Patient
			text.status	generated
			text.div	Have a full blood count to identify anaemia or polycythaemia
CARD 4
Summary			Consider COPD diagnosis in older adults with multi-morbidity and cognitive impairment when presenting a risk factor, having one or more of the symptoms, and FEV1/FVC ratio is less than 70%.
Detailed description			Consider COPD diagnosis in older adults with multi-morbidity and cognitive impairment when presenting a risk factor (generally smoking or a history of smoking), having one or more of the symptoms: exertional breathlessness, chronic cough, regular sputum production, frequent winter bronchitis, or wheeze, and FEV1/FVC ratio is less than 70%.
Source			Holistic patient-centred CAREPATH best practice guideline, Chapter 15.1 [pp. 63]
			Link to CarePATH best practice guideline
CARD 5
Summary			Consider referral to Pneumologist when there is diagnostic uncertainty (FEV1/FVC ratio ≥ 70%).
Detailed description			Refer older adults for specialist advice when there is diagnostic uncertainty (FEV1/FVC ratio ≥ 70%).
Source			Holistic patient-centred CAREPATH best practice guideline, Chapter 15.3.1 [pp. 64]
			Link to CarePATH best practice guideline
Suggestion 1
label	Consider a Referral to Pneumologist for confirming diagnosis and therapy optimization.
ACTION 1	type	create
	description	Consider a Referral to Pneumologist for confirming diagnosis and therapy optimization.
	resource	Service Request	status	draft
			extension	http://kroniq.srdc.com.tr/fhir/StructureDefinition/title | Referral to Pneumologist
			intent	proposal
			occuranceDateTime	{{Today}}
			category	http://www.kroniq.srdc.com.tr/fhir/care-plan-activity-category | referral | Patient referral to specialist
			authoredOn	Automatically set to the date the CDS call is made
			performerType	SNOMED | 41672002 | Respiratory physician
			performer	-
			text.status	generated
			text.div	Referral to Pneumologist for confirming diagnosis and therapy optimization
CARD 6
Summary			Consider setting COPD severity as 'Mild' since FEV-1 ≥ 80%.
Detailed description			Severity of COPD should be set using the GOLD-Classification: * Mild (Stage 1) when FEV-1 ≥ 80% * Moderate (Stage 2) when FEV-1 50-79% * Severe (Stage 3) when FEV-1 30-49%. * Very severe (Stage 4) when FEV-1 ≤ 30%.
Source			Holistic patient-centred CAREPATH best practice guideline, Chapter 15.1 [pp. 63]
			Link to CarePATH best practice guideline
CARD 7
Summary			Consider setting COPD severity as 'Moderate' since FEV-1 is between 50% and 79%.
Detailed description			Severity of COPD should be set using the GOLD-Classification: * Mild (Stage 1) when FEV-1 ≥ 80% * Moderate (Stage 2) when FEV-1 50-79% * Severe (Stage 3) when FEV-1 30-49%. * Very severe (Stage 4) when FEV-1 ≤ 30%.
Source			Holistic patient-centred CAREPATH best practice guideline, Chapter 15.1 [pp. 63]
			Link to CarePATH best practice guideline
CARD 8
Summary			Consider setting COPD severity as 'Severe' since FEV-1 is between 30% and 49%.
Detailed description			Severity of COPD should be set using the GOLD-Classification: * Mild (Stage 1) when FEV-1 ≥ 80% * Moderate (Stage 2) when FEV-1 50-79% * Severe (Stage 3) when FEV-1 30-49%. * Very severe (Stage 4) when FEV-1 ≤ 30%.
Source			Holistic patient-centred CAREPATH best practice guideline, Chapter 15.1 [pp. 63]
			Link to CarePATH best practice guideline
CARD 9
Summary			Consider setting COPD severity as 'Very severe' since FEV-1 ≤ 30%.
Detailed description			Severity of COPD should be set using the GOLD-Classification: * Mild (Stage 1) when FEV-1 ≥ 80% * Moderate (Stage 2) when FEV-1 50-79% * Severe (Stage 3) when FEV-1 30-49%. * Very severe (Stage 4) when FEV-1 ≤ 30%.
Source			Holistic patient-centred CAREPATH best practice guideline, Chapter 15.1 [pp. 63]
			Link to CarePATH best practice guideline
CARD 10
Summary			Assess COPD symptoms.
Detailed description			Ask the person if they have: weight loss, reduced exercise tolerance, waking at night with breathlessness, ankle swelling, fatigue, occupational hazards, chest pain, or haemoptysis.
Source			Holistic patient-centred CAREPATH best practice guideline, Chapter 15.1 [pp. 63]
			Link to CarePATH best practice guideline
CARD 11
Summary			Fill in mMRC questionnaire to assess Dyspnoea scale of grading.
Detailed description			Dyspnoea should be scaled as follows: * Grade 0: I only get breathless with strenuous exercise * Grade 1: I get short of breath when hurrying on level ground or walking up a slight hill * Grade 2: On level ground, I walk slower than people of the same age because of breathlessness, or I have to stop for breath when walking at my own pace on the level * Grade 3: I stop for breath after walking abo…
Source			Holistic patient-centred CAREPATH best practice guideline, Chapter 15.1 [pp. 63]
			Link to CarePATH best practice guideline
CARD 12
Summary			Assess the relevant factors associated with prognosis.
Detailed description			From diagnosis onwards, when discussing prognosis and treatment decisions with older adults with stable COPD, think about the following factors that are individually associated with prognosis: FEV, smoking status, breathlessness (MRC scale), chronic hypoxia and/or cor-pulmonale, low BMI, severity and frequency of exacerbations, hospital admissions, symptom burden (for example, COPD Assessment Tes…
Source			Holistic patient-centred CAREPATH best practice guideline, Chapter 15.3.1 [pp. 64]
			Link to CarePATH best practice guideline
CARD 13
Summary			Consider Referral for therapy optimization when suspected severe COPD.
Detailed description			Refer older adults for specialist advice for therapy optimization when suspected severe COPD.
Source			Holistic patient-centred CAREPATH best practice guideline, Chapter 15.3.1 [pp. 64]
			Link to CarePATH best practice guideline
Suggestion 1
label	Consider Referral to Pneumologist for therapy optimization when suspected severe COPD.
ACTION 1	type	create
	description	Consider Referral to Pneumologist for therapy optimization when suspected severe COPD.
	resource	Service Request	status	draft
			extension	http://kroniq.srdc.com.tr/fhir/StructureDefinition/title | Referral for therapy optimization
			intent	proposal
			occuranceDateTime	{{Today}}
			category	http://www.kroniq.srdc.com.tr/fhir/care-plan-activity-category | referral | Patient referral to specialist
			authoredOn	Automatically set to the date the CDS call is made
			performerType	SNOMED | 41672002 | Respiratory physician
			performer	-
			text.status	generated
			text.div	Referral to Pneumologist for therapy optimization when suspected severe COPD
CARD 14
Summary			Consider Referral for therapy optimization when onset of cor-pulmonale.
Detailed description			Refer older adults for specialist advice for therapy optimization when onset of cor-pulmonale.
Source			Holistic patient-centred CAREPATH best practice guideline, Chapter 15.3.1 [pp. 64]
			Link to CarePATH best practice guideline
Suggestion 1
label	Consider Referral to Cardiologist for therapy optimization when onset of cor-pulmonale.
ACTION 1	type	create
	description	Consider Referral to Cardiologist for therapy optimization when onset of cor-pulmonale.
	resource	Service Request	status	draft
			extension	http://kroniq.srdc.com.tr/fhir/StructureDefinition/title | Referral to Cardiologist for therapy optimization
			intent	proposal
			occuranceDateTime	{{Today}}
			category	http://www.kroniq.srdc.com.tr/fhir/care-plan-activity-category | referral | Patient referral to specialist
			authoredOn	Automatically set to the date the CDS call is made
			performerType	SNOMED | 17561000 | Cardiologist
			performer	-
			text.status	generated
			text.div	Referral to Cardiologist for therapy optimization when onset of cor-pulmonale.
CARD 15
Summary			Consider Referral for detailed assessment.
Detailed description			Refer older adults for specialist advice for assessment for oxygen therapy, or long-term nebuliser therapy, or need for continued treatment or supervise withdrawal.
Source			Holistic patient-centred CAREPATH best practice guideline, Chapter 15.3.1 [pp. 64]
			Link to CarePATH best practice guideline
Suggestion 1
label	Consider Referral to Pneumologist for detailed assessment.
ACTION 1	type	create
	description	Consider Referral for assessment for oxygen therapy, or long-term nebuliser therapy, or need for continued treatment or supervise withdrawal.
	resource	Service Request	status	draft
			extension	http://kroniq.srdc.com.tr/fhir/StructureDefinition/title | Referral for detailed assessment
			intent	proposal
			occuranceDateTime	{{Today}}
			category	http://www.kroniq.srdc.com.tr/fhir/care-plan-activity-category | referral | Patient referral to specialist
			authoredOn	Automatically set to the date the CDS call is made
			performerType	SNOMED | 41672002 | Respiratory physician
			performer	-
			text.status	generated
			text.div	Referral to Pneumologist for assessment for oxygen therapy, or long-term nebuliser therapy, or need for continued treatment or supervise withdrawal
CARD 16
Summary			Consider Referral for detailed assessment of the need for oxygen therapy.
Detailed description			Assess the need for oxygen therapy in people with very severe airflow obstruction (FEV1 below 30% predicted), cyanosis, polycythaemia, peripheral oedema (swelling), a raised jugular venous pressure, pulmonary hypertension, or an oxygen saturations of 92% or less breathing air. Be aware that inappropriate oxygen therapy in people with COPD may cause respiratory depression.
Source			Holistic patient-centred CAREPATH best practice guideline, Chapter 15.3.1 [pp. 67]
			Link to CarePATH best practice guideline
Suggestion 1
label	Consider Referral to Pneumologist for detailed assessment of the need for oxygen therapy.
ACTION 1	type	create
	description	Consider Referral for assessment of the need for oxygen therapy.
	resource	Service Request	status	draft
			extension	http://kroniq.srdc.com.tr/fhir/StructureDefinition/title | Referral for assessment of the need for oxygen therapy
			intent	proposal
			occuranceDateTime	{{Today}}
			category	http://www.kroniq.srdc.com.tr/fhir/care-plan-activity-category | referral | Patient referral to specialist
			authoredOn	Automatically set to the date the CDS call is made
			performerType	SNOMED | 41672002 | Respiratory physician
			performer	-
			text.status	generated
			text.div	Referral to Pneumologist for detailed assessment of the need for oxygen therapy
CARD 17
Summary			Consider Referral for detailed assessment of the need for Non-invasive mechanical ventilation.
Detailed description			* Consider Non-invasive mechanical ventilation when: a. Respiratory acidosis (pH ≤ 7.35 or partial pressure of carbon dioxide ≥45 mm Hg) b. Severe dyspnoea with signs of respiratory muscle fatigue such as use of accessory muscle, paradoxical motion of abdomen, or retraction of the intercostal spaces, especially in the presence of thoracical deformation. c. Persistent hypoxemia despite adequate ox…
Source			Holistic patient-centred CAREPATH best practice guideline, Chapter 15.3.1 [pp. 67]
			Link to CarePATH best practice guideline
Suggestion 1
label	Consider Referral to Pneumologist for detailed assessment of the need for Non-invasive mechanical ventilation.
ACTION 1	type	create
	description	Consider Referral for detailed assessment of the need for Non-invasive mechanical ventilation.
	resource	Service Request	status	draft
			extension	http://kroniq.srdc.com.tr/fhir/StructureDefinition/title | Referral for detailed assessment of the need for Non-invasive mechanical ventilation
			intent	proposal
			occuranceDateTime	{{Today}}
			category	http://www.kroniq.srdc.com.tr/fhir/care-plan-activity-category | referral | Patient referral to specialist
			authoredOn	Automatically set to the date the CDS call is made
			performerType	SNOMED | 41672002 | Respiratory physician
			performer	-
			text.status	generated
			text.div	Referral to Pneumologist for detailed assessment of the need for Non-invasive mechanical ventilation
CARD 18
Summary			Consider hospitalization.
Detailed description			Consider hospitalization when: a. Marked increase in intensity of symptoms. b. Patient has acute exacerbation characterised by increased dyspnoea, cough or sputum production, plus one or more of the following: Inadequate response to ambulatory management, inability to walk between rooms when previously mobile, inability to eat or sleep because of dyspnoea. c. Cannot manage at home even with home-…
Source			Holistic patient-centred CAREPATH best practice guideline, Chapter 15.3.1 [pp. 65]
			Link to CarePATH best practice guideline
CARD 19
Summary			Consider offering LABA + ICS.
Detailed description			Consider offering LABA + ICS for people who have asthmatic features or features suggesting steroid responsiveness, and remain breathless or have exacerbations despite optimized non-pharmacological management and using a short-acting bronchodilator.
Source			Holistic patient-centred CAREPATH best practice guideline, Chapter 15.3.2 [pp. 66]
			Link to CarePATH best practice guideline
CARD 20
Summary			Consider offering inhaled therapy with LAMA + LABA.
Detailed description			In patients with stable COPD, offer inhaled therapy with LAMA + LABA if they do not have asthmatic features or features suggesting steroid responsiveness, and remain breathless or have exacerbations despite optimized non-pharmacological management and using a short-acting bronchodilator.
Source			Holistic patient-centred CAREPATH best practice guideline, Chapter 15.3.2 [pp. 65]
			Link to CarePATH best practice guideline
CARD 21
Summary			Consider offering LAMA + LABA + ICS.
Detailed description			For people with COPD who are taking LABA + ICS, offer LAMA + LABA + ICS if their day-to-day symptoms continue to adversely impact their quality of life, or they have a severe exacerbation (requiring hospitalization), or they have 2 moderate exacerbations within a year. Before starting LAMA + LABA + ICS, conduct a clinical review to ensure that the person's non-pharmacological COPD management is o…
Source			Holistic patient-centred CAREPATH best practice guideline, Chapter 15.3.2 [pp. 66]
			Link to CarePATH best practice guideline
CARD 23
Summary			Consider offering LAMA + LABA + ICS for three months and conduct a clinical review to establish whether or not LAMA + LABA should be taken furthermore.
Detailed description			For people with COPD who are taking LAMA + LABA and whose day-to-day symptoms adversely impact their quality of life, consider a trial of LAMA + LABA + ICS, lasting for 3 months. After 3 months, conduct a clinical review to establish whether or not LAMA + LABA. Before starting LAMA + LABA + ICS, conduct a clinical review to ensure that the person's non-pharmacological COPD management is optimized…
Source			Holistic patient-centred CAREPATH best practice guideline, Chapter 15.3.2 [pp. 66]
			Link to CarePATH best practice guideline
Suggestion 1
label	Consider conducting a clinical review to establish whether or not LAMA + LABA should be taken furthermore.
ACTION 1	type	create
	description	Consider setting a follow-up appointment to conduct a clinical review to establish whether or not LAMA + LABA should be taken furthermore.
	resource	Appointment	extension	http://kroniq.srdc.com.tr/fhir/StructureDefinition/title | Follow-up appointment to conduct a clinical review to establish whether or not LAMA + LABA should be taken furthermore
			description	Follow-up appointment to conduct a clinical review to establish whether or not LAMA + LABA should be taken furthermore
			status	proposed
			start	{{Today+3 months}}
			specialty	-
CARD 24
Summary			Consider offering oral corticosteroid therapy.
Detailed description			Long-term use of oral corticosteroid therapy in COPD is not normally recommended. Some patients with advanced COPD may need long-term oral corticosteroids when these cannot be withdrawn following an exacerbation. In these cases, the dose of oral corticosteroids should be kept as low as possible.
Source			Holistic patient-centred CAREPATH best practice guideline, Chapter 15.3.2 [pp. 66]
			Link to CarePATH best practice guideline
CARD 25
Summary			Consider stopping ICS and continue with LAMA + LABA.
Detailed description			If symptoms have not improved, stop LAMA + LABA + ICS and switch back to LAMA + LABA.
Source			Holistic patient-centred CAREPATH best practice guideline, Chapter 15.3.2 [pp. 66]
			Link to CarePATH best practice guideline
CARD 26
Summary			Consider continuing with LAMA + LABA + ICS.
Detailed description			If symptoms have improved, continue with LAMA + LABA + ICS.
Source			Holistic patient-centred CAREPATH best practice guideline, Chapter 15.3.2 [pp. 66]
			Link to CarePATH best practice guideline
CARD 27
Summary			Consider assessing correct use of device.
Detailed description			Assess the ability to use and the correct use of the device, consider an alternative device, if handling is not correct and cannot be taught.
Source			Holistic patient-centred CAREPATH best practice guideline, Chapter 15.3.2 [pp. 65]
			Link to CarePATH best practice guideline
CARD 28
Summary			Guidance on use of nebulised therapy.
Detailed description			Do not continue nebulised therapy without assessing and confirming that one or more of the following occurs: a reduction in symptoms, an increase in the ability to undertake activities of daily living, an increase in exercise capacity, or an improvement in lung function.
Source			Holistic patient-centred CAREPATH best practice guideline, Chapter 15.3.2 [pp. 66,67]
			Link to CarePATH best practice guideline
CARD 29
Summary			Consider starting opioids.
Detailed description			Opioids (oral or parenteral) are effective therapy for the management of refractory dyspnoea and should be considered on an individual basis.
Source			Holistic patient-centred CAREPATH best practice guideline, Chapter 15.3.2 [pp. 67]
			Link to CarePATH best practice guideline
CARD 30
Summary			Consider starting Benzodiazepines, tricyclic anti-depressants, or major tranquilisers.
Detailed description			Anxiety and depression accompany dyspnoea and should be evaluated and treated accordingly. Benzodiazepines, tricyclic anti-depressants and major tranquilisers may be useful in this context.
Source			Holistic patient-centred CAREPATH best practice guideline, Chapter 15.3.2 [pp. 67]
			Link to CarePATH best practice guideline
CARD 31
Summary			Consider oxygen therapy or fans for breathlessness.
Detailed description			Oxygen and fans blowing air onto the face can relieve breathlessness.
Source			Holistic patient-centred CAREPATH best practice guideline, Chapter 15.3.2 [pp. 67]
			Link to CarePATH best practice guideline
CARD 32
Summary			Consider therapy for fatigue.
Detailed description			Fatigue can be improved by self-management education, pulmonary rehabilitation, and mind-body interventions.
Source			Holistic patient-centred CAREPATH best practice guideline, Chapter 15.3.2 [pp. 67]
			Link to CarePATH best practice guideline
Suggestion 1
label	Consider self-management education, pulmonary rehabilitation, and mind-body interventions.
ACTION 1	type	create
	description	Give education material on self-management of COPD.
	resource	Communication Request	status	draft
			extension	http://kroniq.srdc.com.tr/fhir/StructureDefinition/title | Education material on self-management of COPD
			subject	Patient
			authoredOn	Automatically set to the date the CDS call is made
			payload.contentAttachment.language	en
			payload.contentAttachment.url	https://www.nhsinform.scot/illnesses-and-conditions/lungs-and-airways/copd/living-well-with-copd/
			payload.contentAttachment.title	Living well with COPD
ACTION 2	type	create
	description	Give education material on mental wellbeing and mind-body interventions.
	resource	Communication Request	status	draft
			extension	http://kroniq.srdc.com.tr/fhir/StructureDefinition/title | Education material on mental wellbeing
			subject	Patient
			authoredOn	Automatically set to the date the CDS call is made
			payload.contentAttachment.language	en
			payload.contentAttachment.url	https://www.nhsinform.scot/healthy-living/mental-wellbeing/five-steps-to-mental-wellbeing
			payload.contentAttachment.title	Five steps to mental wellbeing
ACTION 3	type	create
	description	Consider Referral for pulmonary rehabilitation.
	resource	Service Request	status	draft
			extension	http://kroniq.srdc.com.tr/fhir/StructureDefinition/title | Referral for pulmonary rehabilitation
			intent	proposal
			occuranceDateTime	{{Today}}
			category	http://www.kroniq.srdc.com.tr/fhir/care-plan-activity-category | referral | Patient referral to specialist
			authoredOn	Automatically set to the date the CDS call is made
			performerType	SNOMED | 41672002 | Respiratory physician
			performer	-
			text.status	generated
			text.div	Referral for pulmonary rehabilitation
Autofill CDS cards
CARD 33
Summary			Consider Depression diagnosis when GDS-4 score is greater than 1.
Detailed description			Consider Depression diagnosis when GDS-4 score is greater than 1.
Source			Holistic patient-centred CAREPATH best practice guideline, Chapter 15.2 [pp. 64]
			Link to CarePATH best practice guideline
CARD 34
Summary			Consider Polycythaemia diagnosis when Hemoglobin is greater than 16.5 g/dL (10.3 mmol/L) in men or greater than 16.0 g/dL (10.0 mmol/L) in women.
Detailed description			Consider Polycythaemia diagnosis when Hemoglobin is greater than 16.5 g/dL (10.3 mmol/L) in men or greater than 16.0 g/dL (10.0 mmol/L) in women.
Source			Holistic patient-centred CAREPATH best practice guideline, Chapter 15.2 [pp. 64]
			Link to CarePATH best practice guideline
CARD 35
Summary			Consider Polycythaemia diagnosis when Hematocrit is greater than 49% in men or greater than 48% in women.
Detailed description			Consider Polycythaemia diagnosis when Hematocrit is greater than 49% in men or greater than 48% in women.
Source			Holistic patient-centred CAREPATH best practice guideline, Chapter 15.2 [pp. 64]
			Link to CarePATH best practice guideline
CARD 36
Summary			Consider Dyspnea when mMRC score is greater than 1.
Detailed description			Consider Dyspnea when mMRC score is greater than 1.
Source			Holistic patient-centred CAREPATH best practice guideline, Chapter 15.2 [pp. 64]
			Link to CarePATH best practice guideline
CARD 37
Summary			Consider Reduced exercise tolerance when mMRC score is greater than 1.
Detailed description			Consider Reduced exercise tolerance when mMRC score is greater than 1.
Source			Holistic patient-centred CAREPATH best practice guideline, Chapter 15.2 [pp. 64]
			Link to CarePATH best practice guideline
CARD 38
Summary			Consider Respiratory acidosis when Blood pH is less than or equal to 7.35 or PaCO2 is greater than or equal to 45 mmHg.
Detailed description			Consider Respiratory acidosis when Blood pH is less than or equal to 7.35 or PaCO2 is greater than or equal to 45 mmHg.
Source			Holistic patient-centred CAREPATH best practice guideline, Chapter 15.2 [pp. 64]
			Link to CarePATH best practice guideline
CARD 39
Summary			Consider Severe or worsening respiratory acidosis when Blood pH is less than 7.3.
Detailed description			Consider Severe or worsening respiratory acidosis when Blood pH is less than 7.3.
Source			Holistic patient-centred CAREPATH best practice guideline, Chapter 15.2 [pp. 64]
			Link to CarePATH best practice guideline
CARD 40
Summary			Consider Worsening hypercapnia when PaCO2 is greater than 70 mmHg.
Detailed description			Consider Worsening hypercapnia when PaCO2 is greater than 70 mmHg.
Source			Holistic patient-centred CAREPATH best practice guideline, Chapter 15.2 [pp. 64]
			Link to CarePATH best practice guideline
