# Supplementary material for: Transforming evidence-based clinical guidelines into implementable clinical decision support services: the CAREPATH study for multimorbidity management
Source: Front Med (Lausanne). 2024 May 27;11:1386689. doi: 10.3389/fmed.2024.1386689 (PMC11163046; doi:10.3389/fmed.2024.1386689)
Supplement: Supplementary file 7 [file Table_7.XLSX]

## Sheet: Rules
RULE NO	CONTEXT	PURPOSE	TRIGGER	RULE DESCRIPTION	INPUT as Clinical Concepts	OUTPUT
Identification of the rule (number)	Clinical context of the CDS rules, such as target disease combination, stages in clinical process, relevant clinical activity, decision making point, etc..	Purpose of the CDS rules, e.g. for treatment suggestions, poly-pharmacy detection, risk assessment, lifestyle, etc.	Trigger condition of the CDS rules, i.e. when the rules should be triggered.	Detailed description of the CDS rules/algorithm. Could be IF - THEN - ELSE statement, mathematical formula, or a link to more sophisticated description such as flowchart.	What input are needed by the rules? The data elements used by a rule to make inferences. E.g. patient age, gender, blood pressure, medication list, etc. The precise meaning of each clinical concept is needed. Please group them as conditions(diagnosis, symptomps), observatiions (lab results, vital signs), clinicians assessments (that possibly cannot be retrieved from EHRs), Precedures, Family Hist…	What kind of output should the rules produce? The possible actions with the offered choices a decision support module can take. Examples include alert (safe, caution, contraindication), reminder, medication suggestion, care plan goal/activity suggestion, risk report, or just text information.
HF 1	Refer people with suspected heart failure (HF) and an NTproBNP level above 2,000 ng/litre (236 pmol/litre) urgently	Diagnosis	This CDS will be triggered by AICP during patient visit	IF Patient has [Risk of Heart Failure] AND [NTproBNP level] > 2,000 ng/litre (236 pmol/litre)]	Assessments: * Risk of Heart Failure Observations: * NTproBNP level	ACTIVITIES Refer people with suspected heart failure (HF) and an NTproBNP level above 2,000 ng/litre (236 pmol/litre) urgently to have specialist assessment and transthoracic echocardiography within 2 weeks (Card 1)
HF 2	Refer people with suspected heart failure (HF) and an NTproBNP levels are between 400 and 2,000 ng/litre (47 to 236 pmol/litre) urgently	Diagnosis	This CDS will be triggered by AICP during patient visit	IF Patient has [Risk of Heart Failure] AND [ 400 < [NTproBNP level] < 2,000 ng/litre (47 - 236 pmol/litre)] ]	Assessments: * Risk of Heart Failure Observations: * NTproBNP level	ACTIVITIES Refer people with suspected heart failure (HF) and an NTproBNP levels are between 400 and 2,000 ng/litre (47 to 236 pmol/litre) urgently to have specialist assessment and transthoracic echocardiography within 6 weeks.s (Card 2)
HF 3	Review alternative causes for symptoms of HF in people with suspected heart failure (HF) and NT-proBNP levels below 400 ng/litre.	Diagnosis	This CDS will be triggered by AICP during patient visit	IF Patient has [Risk of Heart Failure] AND [NTproBNP level] < 400 ng/litre (47 pmol/litre)]]	Assessments: * Risk of Heart Failure Observations: * NTproBNP level	ACTIVITIES Review alternative causes for symptoms of HF in people with suspected heart failure (HF) and NT-proBNP levels below 400 ng/litre (Card 3)
HF 4	When a diagnosis of HF has been made perform transthoracic echocardiography	Diagnosis	This CDS will be triggered by AICP during patient visit	IF Patient has new [Heart Failure] diagnosis	Conditions: * Heart Failure	ACTIVITIES Assess severity, etiology, precipitating factors, type of cardiac dysfunction, and correctable causes (Card 4) Perform transthoracic echocardiography (Card 5) Perform NYHA classification (AICP) (New York Health Association) to assess the severity of heart failure (Card 6) Perform cardiac dysfunction classification by LVEF OR by entering LVEF measure (Card 7) Offer self-management educa…
HF 5	Diuretics should be routinely used according to need low to medium dose of loop diuretics	Medication treatment	This CDS will be triggered by AICP during patient visit	IF patient is with [Heart Failure] AND NOT [preserved ejection fraction (HFpEF)] AND NOT on [Diuretics]	Conditions: * Heart Failure * HF with preserved ejection fraction (HFpEF) Medications: * Diuretics	ACTIVITIES Diuretics should be routinely used for the relief of congestive symptoms and fluid retention in people with HF (Card 9)
HF 6	Diuretics should be routinely used according to need low to medium dose of loop diuretics	Medication treatment	This CDS will be triggered by AICP during patient visit	IF patient is with [Heart Failure] AND [preserved ejection fraction (HFpEF)] AND NOT on [Diuretics]	Conditions: * Heart Failure * HF with preserved ejection fraction (HFpEF) Medications: * Diuretics	ACTIVITIES Low to medium dose of loop diuretics is recommended for people who have HF with preserved ejection fraction (HFpEF) (Card 10)
HF 7	Diuretics should be routinely used according to need low to medium dose of loop diuretics	Medication treatment	This CDS will be triggered by AICP during patient visit	IF patient is with [Heart Failure] AND [preserved ejection fraction (HFpEF)] AND [Oedema] AND Patient is on [Diuretics] AND NOT on [thiazide-type diuretics]	Conditions: * Heart Failure * HF with preserved ejection fraction (HFpEF) * Oedema Medications: * Diuretics * Loop diuretics * Thiazide-type diuretics	ACTIVITIES Consider combination of a loop diuretic with thiazide-type diuretic in patients with resistant oedema who do not respond to an increase in loop diuretic doses (Card 11)
HF 8	Diuretics should be routinely used according to need low to medium dose of loop diuretics	Medication treatment	This CDS will be triggered by AICP during patient visit	IF patient is with [Heart Failure] AND [preserved ejection fraction (HFpEF)] AND [Oedema] AND Patient is on [Diuretics] AND on [thiazide-type diuretics]	Conditions: * Heart Failure * HF with preserved ejection fraction (HFpEF) * Oedema Medications: * Diuretics * Loop diuretics * Thiazide-type diuretics	ACTIVITIES Refer patient to a specialist for further advice if does not respond to treatment with combination of a loop diuretic and thiazide-type diuretics (Card 12)
HF9	ACE inhibitors or ARB are recommended in patients with left ventricle systolic dysfunction to decrease the risk of developing HF	Medication treatment	This CDS will be triggered by AICP during patient visit	IF Patient has [Left ventricle systolic dysfunction] AND Patient is NOT on ([ACE-inhibitor] OR [ARB])	Condition: * Left ventricle systolic dysfunction Observations: * Serum creatinine * eGFR * Sodium * Potassium Medication: * ACEi * ARB	ACTIVITIES ACE inhibitors or ARB are recommended in patients with left ventricle systolic dysfunction (Card 13) Measure serum sodium and potassium, and assess renal function. (Card 14) Recommend clinician ‘Measure serum sodium and potassium, and assess renal function, before and 1 to 2 weeks after starting an ACE inhibitor/ARB, and after each dose increment.’
HF 10	Introduce beta-blockers in a “start low, go slow” manner. Assess heart rate and clinical status after each titration.	Medication treatment	This CDS will be triggered by AICP during patient visit	IF Patient has [Heart Failure] AND [HF with reduced ejection fraction (HFrEF) ([LVEF =< 35%)] AND [Severe LV dysfunction ([LVEF =< 40%])	Conditions: * Heart Failure * HF with reduced ejection fraction (HFrEF) Observations: * Severe LV dysfunction * LVEF	ACTIVITIES Consider introducing beta-blockers in a “start low, go slow” manner in all patients with HFrEF associated with a moderate or severe reduction in LVEF (LVEF ≤40%). Assess heart rate and clinical status after each titration. (Card 15) Recommend clinician to ‘Introduce beta-blockers in all patients with HFrEF associated with a moderate or severe reduction in LVEF (LVEF ≤40%) unless contra…
HF 11	Offer a Mineralocorticoid Receptor Antagonist, in addition to an ACE inhibitor (or ARB) and beta-blocker	Medication treatment	This CDS will be triggered by AICP during patient visit	IF Patient has [Heart Failure] AND [HF with reduced ejection fraction (HFrEF) ([LVEF =< 35%)] AND Patient is on ([ACE inhibitor] or [ARB]) and [Beta-blocker]	Conditions: * Heart Failure * HF with reduced ejection fraction (HFrEF) Observations: * LVEF * Serum creatinine * eGFR * Sodium * Potassium Medication * ACEi * ARB * Beta-blocker * Mineralocorticoid Receptor Antagonist	ACTIVITIES Consider offering a Mineralocorticoid Receptor Antagonist, in addition to an ACE inhibitor (or ARB) and beta-blocker to people who have HF with reduced ejection fraction (HFrEF) (Card 16) Measure serum sodium and potassium, and assess renal function, before and after starting a Mineralocorticoid Receptor Antagonist and after each dose increment (Card 17)
HF 12	SGLT2 inhibitors are recommended in patients with HFrEF or HFpEF irrespective of diabetes presence, to reduce hospitalisations for HF, major cardiovascular events, end-stage renal dysfunction, and cardiovascular death	Medication treatment	This CDS will be triggered by AICP during patient visit	IF Patient has [Heart Failure] AND ([HF with reduced ejection fraction (HFrEF) ([LVEF =< 35%)] OR [preserved ejection fraction (HFpEF)])	Conditions: * Heart Failure * HF with preserved ejection fraction (HFpEF) * HF with reduced ejection fraction (HFrEF) Observations: * LVEF Medications * SGLT2 inhibitors (dapagliflozin, empagliflozin, canagliflozin, and sotagliflozin)	ACTIVITIES Consider prescribing SGLT2 inhibitors in patients with HFrEF or HFpEF (Card 18) Recommend clinician to ‘Prescribe SGLT2 inhibitors (dapagliflozin, empagliflozin, canagliflozin, and sotagliflozin) are recommended in patients with HFrEF or HFpEF irrespective of diabetes presence, to reduce hospitalisations for HF, major cardiovascular events, end-stage renal dysfunction, and cardiovascul…
HF 13	In patients with moderate or severe mitral stenosis or mechanical prosthetic heart valves, AVK should be prescribed instead of DOACs	Medication treatment	This CDS will be triggered by AICP during patient visit	IF Patient has [Atrial Fibrillation] AND [Non-valvular atrial fibrillation] AND ([Mild dementia] OR [Mild cognitive impairment])	Conditions * Atrial Fibrillation Observations: * Non-valvular atrial fibrillation * Mild dementia * Mild cognitive impairment Medications: * OAC	ACTIVITIES Consider prescribing OAC irrespective of the risk of stroke or CHA2DS2-VASc score, unless specific contraindication for OAC exists (Card 19) Recommend clinician ‘Every multimorbid older adult with mild cognitive impairment or mild dementia with non- valvular atrial fibrillation (NV-AF), benefits from OAC irrespective of the risk of stroke or CHA2DS2-VASc score, unless specific contrain…
HF 14	In patients with moderate or severe mitral stenosis or mechanical prosthetic heart valves, AVK should be prescribed instead of DOACs	Medication treatment	This CDS will be triggered by AICP during patient visit	IF patient has [Sinus rhythm] AND ( [History of thromboembolism] OR [Left ventricle aneurysm] OR [Intracardiac thrombus] )	Conditions * Thromboembolism * Intracardiac thrombus Observations: * Sinus rhythm * Left Ventricle aneurysm Medications: * Anticoagulation	ACTIVITIES Consider prescribing anticoagulation for those with a history of thromboembolism, LV aneurysm, or intracardiac thrombus (Card 20) Recommend clinician ‘Every multimorbid older adult with mild cognitive impairment or mild dementia with non- valvular atrial fibrillation (NV-AF), benefits from OAC irrespective of the risk of stroke or CHA2DS2-VASc score, unless specific contraindication fo…
HF 15	In patients with moderate or severe mitral stenosis or mechanical prosthetic heart valves, AVK should be prescribed instead of DOACs	Medication treatment	This CDS will be triggered by AICP during patient visit	IF patient has [Moderate mitral stenosis] OR [Severe mitral stenosis] OR [Mechanical prosthetic heart valves]	Conditions * Mechanical prosthetic heart valves Observations: * Moderate mitral stenosis * Severe mitral stenosis Medications: * Warfarin * Acenocoumarol	ACTIVITIES Consider prescribing AVK (e.g., Warfarin and Acenocoumarol) instead of DOACs in patients with moderate or severe mitral stenosis or mechanical prosthetic heart valves (Card 21) Recommend clinician ‘Every multimorbid older adult with mild cognitive impairment or mild dementia with non- valvular atrial fibrillation (NV-AF), benefits from OAC irrespective of the risk of stroke or CHA2DS2-…
HF 16	Iron studies should be performed In patients with HFrEF	Medication treatment	This CDS will be triggered by AICP during patient visit	IF patient has [HF with reduced ejection fraction (HFrEF) ([LVEF =< 35%)] AND [Persistent symptoms despite optimised therapy]	Conditions: * HF with reduced ejection fraction (HFrEF) Observations: * LVEF * Persistent symptoms despite optimised therapy * Ferritin * Iron saturation	ACTIVITIES Consider performing iron studies if patient with HFrEF has persistent symptoms despite optimised therapy (Card 22)
HF 17	Iron studies should be performed In patients with HFrEF	Medication treatment	This CDS will be triggered by AICP during patient visit	IF patient has [Iron deficient]	Conditions: * Iron deficiency	ACTIVITIES Consider treatment with intravenous ferric carboxymaltose if the patient is iron deficient (Card 23) Recommend clinician 'If the patient is iron deficient (ferritin <100 mcg/L or transferrin saturation <20%), treatment with intravenous ferric carboxymaltose should be considered.'
HF 18	Monitor the response to titration of medicines closely in people who have HF and Chronic Kidney Disease (CKD)	Titration	This CDS will be triggered by AICP during patient visit	IF Patient has [Heart Failure] AND [Chronic Kidney Disease]	Conditions * Heart Failure * Chronic Kidney disease	ACTIVITIES Monitor the response to titration closely (Card 24) Recommend clinician 'Monitor the response to titration of medicines closely in people who have HF and Chronic Kidney Disease (CKD), considering the increased risk of hyperkalaemia.'
HF 19	Monitor the response to titration of medicines closely in people who have HF and Chronic Kidney Disease (CKD),	Titration	This CDS will be triggered by AICP during patient visit	IF Patient has [Heart Failure] AND [Chronic Kidney Disease] AND [eGFR] < 30 ml/min/1.73 m2	Conditions * Heart Failure * Chronic Kidney disease Observations: * eGFR	ACTIVITIES Consider liaising with a renal physician (Card 25) Recommend clinician ‘For people who have HF and CKD with an eGFR below 30 ml/min/1.73 m2, consider liaising with a renal physician.’

## Sheet: Clinical Concepts
CONDITIONS (Diagnosis and Symptoms)
Terms/concepts used in guidelines	Coding System	Code	Designation	Category	Possible Source
Atrial Fibrillation	ICD-10	I48	Atrial Fibrillation	diagnosis	EHR via TIS/SIS (Physicians will be able to confirm/amend via AICP)
Aortic valve stenosis	ICD-10	I35.0	Nonrheumatic aortic (valve) stenosis	diagnosis	EHR via TIS/SIS (Physicians will be able to confirm/amend via AICP)
Cardiac amyloidosis	ICD-10	I43	Cardiomyopathy in diseases classified elsewhere	diagnosis	EHR via TIS/SIS (Physicians will be able to confirm/amend via AICP)
Chronic kidney disease	ICD-10	N18	Chronic kidney disease	diagnosis	EHR via TIS/SIS (Physicians will be able to confirm/amend via AICP)
	ICD-10	N18.1	Chronic kidney disease, stage 1	diagnosis	EHR via TIS/SIS (Physicians will be able to confirm/amend via AICP)
	ICD-10	N18.2	Chronic kidney disease, stage 2	diagnosis	EHR via TIS/SIS (Physicians will be able to confirm/amend via AICP)
	ICD-10	N18.3	Chronic kidney disease, stage 3	diagnosis	EHR via TIS/SIS (Physicians will be able to confirm/amend via AICP)
	ICD-10	N18.4	Chronic kidney disease, stage 4	diagnosis	EHR via TIS/SIS (Physicians will be able to confirm/amend via AICP)
	ICD-10	N18.5	Chronic kidney disease, stage 5	diagnosis	EHR via TIS/SIS (Physicians will be able to confirm/amend via AICP)
	ICD-10	N18.9	Chronic kidney disease, unspecified	diagnosis	EHR via TIS/SIS (Physicians will be able to confirm/amend via AICP)
	ICD-10	I12.0	Hypertensive renal disease with renal failure	diagnosis	EHR via TIS/SIS (Physicians will be able to confirm/amend via AICP)
	ICD-10	I13.1	Hypertensive heart and renal disease with renal failure	diagnosis	EHR via TIS/SIS (Physicians will be able to confirm/amend via AICP)
	ICD-10	N19	Unspecified kidney failure	diagnosis	EHR via TIS/SIS (Physicians will be able to confirm/amend via AICP)
Dilated cardiomyopathy	ICD-10	I42.0	Dilated cardiomyopathy	diagnosis	EHR via TIS/SIS (Physicians will be able to confirm/amend via AICP)
Dyspnea	ICD-10	R06.0	Dyspnea	symtpom	EHR via TIS/SIS (Physicians will be able to confirm/amend via AICP)
Intracardiac thrombus	ICD-10	I51.3	Intracardiac thrombosis, not elsewhere classified	diagnosis	EHR via TIS/SIS (Physicians will be able to confirm/amend via AICP)
Iron deficiency	ICD-10	E61.1	Iron deficiency	diagnosis	EHR via TIS/SIS (Physicians will be able to confirm/amend via AICP)
Heart Failure	ICD-10	I50	Heart failure	diagnosis	EHR via TIS/SIS (Physicians will be able to confirm/amend via AICP)
	ICD-10	I11	Hypertensive heart disease	diagnosis	EHR via TIS/SIS (Physicians will be able to confirm/amend via AICP)
	ICD-10	I13.0	Hypertensive heart and chronic kidney disease with heart failure and stage 1 through stage 4 chronic kidney disease, or unspecified chronic kidney disease	diagnosis	EHR via TIS/SIS (Physicians will be able to confirm/amend via AICP)
	ICD-10	I13.2	Hypertensive heart and chronic kidney disease with heart failure and with stage 5 chronic kidney disease, or end stage renal disease	diagnosis	EHR via TIS/SIS (Physicians will be able to confirm/amend via AICP)
	ICD-10	I26.0	Pulmonary embolism with acute cor pulmonale	diagnosis	EHR via TIS/SIS (Physicians will be able to confirm/amend via AICP)
HF with mildly reduced ejection fraction	ICD-10	I50.4	Combined systolic (congestive) and diastolic (congestive) heart failure	diagnosis	EHR via TIS/SIS (Physicians will be able to confirm/amend via AICP)
HF preserved ejection fraction (HFpEF)	ICD-10-CM	I50.3	Diastolic (congestive) heart failure	diagnosis	EHR via TIS/SIS (Physicians will be able to confirm/amend via AICP)
HF reduced ejection fraction (HFrEF)	ICD-10-CM	I50.2	Systolic (congestive) heart failure	diagnosis	EHR via TIS/SIS (Physicians will be able to confirm/amend via AICP)
Left ventricle hypertrophy	ICD-10	I51.7	Cardiomegaly	diagnosis	EHR via TIS/SIS (Physicians will be able to confirm/amend via AICP)
Left ventricle systolic dysfunction	ICD-10	I50.1	Left ventricular failure	diagnosis	EHR via TIS/SIS (Physicians will be able to confirm/amend via AICP)
Mechanical prosthetic heart valve	ICD-10	Z95.2	Presence of prosthetic heart valve	diagnosis	EHR via TIS/SIS (Physicians will be able to confirm/amend via AICP)
Mitral valve insufficiency	ICD-10	I34.0	Nonrheumatic mitral (valve) insufficiency	diagnosis	EHR via TIS/SIS (Physicians will be able to confirm/amend via AICP)
Mitral valve stenosis	ICD-10	I34.2	Nonrheumatic mitral (valve) stenosis	diagnosis	EHR via TIS/SIS (Physicians will be able to confirm/amend via AICP)
Oedema	ICD-10	R60	Oedema, not elsewhere classified	symtpom	EHR via TIS/SIS (Physicians will be able to confirm/amend via AICP)
Orthopnea	ICD-10	R06.01	Orthopnea	symtpom	EHR via TIS/SIS (Physicians will be able to confirm/amend via AICP)
Paroxysmal nocturnal dyspnea	ICD-10	R06.00	Dyspnea, unspecified	symtpom	EHR via TIS/SIS (Physicians will be able to confirm/amend via AICP)
Presence of heart peacemaker	ICD-10	Z95.0	Presence of electronic cardiac devices	diagnosis	EHR via TIS/SIS (Physicians will be able to confirm/amend via AICP)
Pulmonary hypertension	ICD-10	I27.0	Primary pulmonary hypertension	diagnosis	EHR via TIS/SIS (Physicians will be able to confirm/amend via AICP)
Restrictive cardiomyopathy	ICD-10	I42.5	Other restrictive cardiomyopathy	diagnosis	EHR via TIS/SIS (Physicians will be able to confirm/amend via AICP)
Thromboembolism	ICD-10	I74.9	Embolism and thrombosis of unspecified artery	diagnosis	EHR via TIS/SIS (Physicians will be able to confirm/amend via AICP)
Valve diseases	ICD-10	I05	Rheumatic mitral valve diseases	diagnosis	EHR via TIS/SIS (Physicians will be able to confirm/amend via AICP)
	ICD-10	I06	Rheumatic aortic valve diseases	diagnosis	EHR via TIS/SIS (Physicians will be able to confirm/amend via AICP)
	ICD-10	I07	Rheumatic tricuspid valve diseases	diagnosis	EHR via TIS/SIS (Physicians will be able to confirm/amend via AICP)
	ICD-10	I08	Multiple valve diseases	diagnosis	EHR via TIS/SIS (Physicians will be able to confirm/amend via AICP)
	ICD-10	I09	Other rheumatic heart diseases	diagnosis	EHR via TIS/SIS (Physicians will be able to confirm/amend via AICP)
OBSERVATIONS (Lab tests, Vital Signs)
Terms/concepts used in guidelines	Coding System	Code	Designation	Unit	Possible Source
eGFR	LOINC	33914-3	Glomerular filtration rate/1.73 sq M.predicted [Volume Rate/Area] in Serum or Plasma by Creatinine-based formula (MDRD)	mL/min/{1.73_m2}	EHR via TIS/SIS (Physicians will be able to confirm/amend via AICP)
Ferritin	LOINC	2276-4	Ferritin [Mass/volume] in Serum or Plasma	ng/mL	EHR via TIS/SIS (Physicians will be able to confirm/amend via AICP)
Iron saturation	LOINC	14801-5	Iron saturation goal Serum or Plasma	%	EHR via TIS/SIS (Physicians will be able to confirm/amend via AICP)
LVEF	LOINC	10230-1	Left ventricular Ejection fraction	%	EHR via TIS/SIS (Physicians will be able to confirm/amend via AICP)
NTproBNP level	LOINC	33762-6	Natriuretic peptide.B prohormone N-Terminal [Mass/volume] in Serum or Plasma	ng/L	EHR via TIS/SIS (Physicians will be able to confirm/amend via AICP)
Potassium	LOINC	6298-4	Potassium [Moles/volume] in Blood	mmol/L	EHR via TIS/SIS (Physicians will be able to confirm/amend via AICP)
Serum creatinine	LOINC	2160-0	Creatinine [Mass/volume] in Serum or Plasma	mg/dL	EHR via TIS/SIS (Physicians will be able to confirm/amend via AICP)
Sodium	LOINC	2947-0	Sodium [Moles/volume] in Blood	mmol/L	EHR via TIS/SIS (Physicians will be able to confirm/amend via AICP)
OBSERVATIONS (Assessments)
Terms/concepts used in guidelines	Coding System	Code	Designation	Unit	Possible Source
Heart failure stage	http://kroniq.srdc.com.tr/fhir/CodeSystem/observation-code	heart-failure-stage	Heart failure stage	(Stages of heart failure)	AICP
HFrEF class	LOINC	88020-3	Functional capacity NYHA	(Functional capacity NYHA values)	AICP
Left ventricular aneurysm	http://kroniq.srdc.com.tr/fhir/CodeSystem/observation-code	left-ventricular-aneurysm	Left ventricular aneurysm	Yes/No	AICP
Mild cognitive impairment	SNOMED	386805003	Mild cognitive impairment	Yes/No	AICP
Mild dementia	SNOMED	428051000124108	Mild dementia	Yes/No	AICP
Moderate mitral stenosis	http://kroniq.srdc.com.tr/fhir/CodeSystem/observation-code	moderate-mitral-stenosis	Moderate mitral stenosis	Yes/No	AICP
Non-valvular atrial fibrillation	http://kroniq.srdc.com.tr/fhir/CodeSystem/observation-code	non-valvular-atrial-fibrillation	Non-valvular atrial fibrillation	Yes/No	AICP
Persistent symptoms despite optimised therapy	http://kroniq.srdc.com.tr/fhir/CodeSystem/observation-code	persistent-symptoms-despite-optimised-therapy	Persistent symptoms despite optimised therapy	Yes/No	AICP
Risk of Heart Failure	http://kroniq.srdc.com.tr/fhir/CodeSystem/observation-code	risk-of-heart failure	Risk of HF	Yes/No	AICP
Severe mitral stenosis	http://kroniq.srdc.com.tr/fhir/CodeSystem/observation-code	severe-mitral-stenosis	Severe mitral stenosis	Yes/No	AICP
Severe LV dysfunction (LV ejection fraction <40%)	http://kroniq.srdc.com.tr/fhir/CodeSystem/observation-code	severe-lv-dysfunction	Severe LV dysfunction (LV ejection fraction <40%)	Yes/No	AICP
Sinus rhythm	http://kroniq.srdc.com.tr/fhir/CodeSystem/observation-code	sinus-rhythm	Sinus rhythm	Yes/No	AICP
VALUE SETS
Value set name	Coding System	Code	Designation
Stages of heart failure	http://kroniq.srdc.com.tr/fhir/CodeSystem/heart-failure-stage	stage-a	Stage A
	http://kroniq.srdc.com.tr/fhir/CodeSystem/heart-failure-stage	stage-b	Stage B
	http://kroniq.srdc.com.tr/fhir/CodeSystem/heart-failure-stage	stage-c	Stage C
	http://kroniq.srdc.com.tr/fhir/CodeSystem/heart-failure-stage	stage-d	Stage D
Functional capacity NYHA values	LOINC	LA28404-4	Class I
	LOINC	LA28405-1	Class II
	LOINC	LA28406-9	Class III
	LOINC	LA28407-7	Class IV
MEDICATIONS
Terms/concepts used in guidelines	Coding System	Code	Designation		Possible Source
ACE inhibitors	ATC	C09A	ACE inhibitors, plain		EHR via TIS/SIS (Physicians will be able to confirm/amend via AICP)
	ATC	C09B	ACE inhibitors, combinations		EHR via TIS/SIS (Physicians will be able to confirm/amend via AICP)
ARBs	ATC	C09C	Angiotensin II Receptor Blockers (ARBs), plain		EHR via TIS/SIS (Physicians will be able to confirm/amend via AICP)
	ATC	C09D	Angiotensin II Receptor Blockers (ARBs), combinations		EHR via TIS/SIS (Physicians will be able to confirm/amend via AICP)
Beta-blockers	ATC	C07	BETA BLOCKING AGENTS		EHR via TIS/SIS (Physicians will be able to confirm/amend via AICP)
Diuretics	ATC	C03	Diuretics		EHR via TIS/SIS (Physicians will be able to confirm/amend via AICP)
Direct Oral Anticoagulant (DOAC)	ATC	B01AF	Direct factor Xa inhibitors		EHR via TIS/SIS (Physicians will be able to confirm/amend via AICP)
	ATC	B01AF02	Apixaban		EHR via TIS/SIS (Physicians will be able to confirm/amend via AICP)
	ATC	B01AE07	Dabigatran		EHR via TIS/SIS (Physicians will be able to confirm/amend via AICP)
	ATC	B01AF01	Rivaroxaban		EHR via TIS/SIS (Physicians will be able to confirm/amend via AICP)
	ATC	B01AF03	Edoxaban		EHR via TIS/SIS (Physicians will be able to confirm/amend via AICP)
MRA	ATC	C03DA	Aldosterone antagonists		EHR via TIS/SIS (Physicians will be able to confirm/amend via AICP)
Oral anticoagulant (OAC)	ATC	B01AF	Direct factor Xa inhibitors		EHR via TIS/SIS (Physicians will be able to confirm/amend via AICP)
	ATC	B01AA	Vitamin K antagonists		EHR via TIS/SIS (Physicians will be able to confirm/amend via AICP)
	ATC	B01AA03	Acenocumarol		EHR via TIS/SIS (Physicians will be able to confirm/amend via AICP)
SGLT2 Inhibitors	ATC	A10BK	SGLT-2 inhibitor		EHR via TIS/SIS (Physicians will be able to confirm/amend via AICP)
Thiazide-type Diuretics	ATC	C03A	Low-ceiling diuretics, Thiazides		EHR via TIS/SIS (Physicians will be able to confirm/amend via AICP)
Vitamin K Antagonist (VKA)	ATC	B01AA	Vitamin K antagonists		EHR via TIS/SIS (Physicians will be able to confirm/amend via AICP)

## Sheet: CDSHookCards
CARD 1
Summary			Refer people with suspected heart failure (HF) and an NTproBNP level above 2,000 ng/litre (236 pmol/litre) urgently to have specialist assessment and transthoracic echocardiography within 2 weeks.
Detailed description			Refer people with suspected heart failure (HF) and an NTproBNP level above 2,000 ng/litre (236 pmol/litre) urgently to have specialist assessment and transthoracic echocardiography within 2 weeks.
Source			Holistic patient-centred CAREPATH best practice guideline, Chapter 11.1 [pp. 37]
			Link to CarePATH best practice guideline
Suggestion 1
label	Refer to have specialist assessment and transthoracic echocardiography.
ACTION 1	type	create
	description	Refer to have specialist assessment and transthoracic echocardiography
	resource	Service Request	status	draft
			extension	http://kroniq.srdc.com.tr/fhir/StructureDefinition/title | Referral to a specialist
			intent	proposal
			occuranceDateTime	{{Today}}
			category	http://www.kroniq.srdc.com.tr/fhir/care-plan-activity-category | referral | Patient referral to specialist
			authoredOn	Automatically set to the date the CDS call is made
			performerType	-
			performer	-
			text.status	generated
			text.div	Refer to have specialist assessment and transthoracic echocardiography in 2 weeks
CARD 2
Summary			Refer people with suspected heart failure (HF) and an NTproBNP levels are between 400 and 2,000 ng/litre (47 to 236 pmol/litre) urgently to have specialist assessment and transthoracic echocardiography within 6 weeks.
Detailed description			Refer people with suspected heart failure (HF) and an NTproBNP levels are between 400 and 2,000 ng/litre (47 to 236 pmol/litre) urgently to have specialist assessment and transthoracic echocardiography within 6 weeks.
Source			Holistic patient-centred CAREPATH best practice guideline, Chapter 11.1 [pp. 37]
			Link to CarePATH best practice guideline
Suggestion 1
label	Refer to have specialist assessment and transthoracic echocardiography
ACTION 1	type	create
	description	Refer to have specialist assessment and transthoracic echocardiography
	resource	Service Request	status	draft
			extension	http://kroniq.srdc.com.tr/fhir/StructureDefinition/title | Referral to a specialist
			intent	proposal
			occuranceDateTime	{{Today}}
			category	http://www.kroniq.srdc.com.tr/fhir/care-plan-activity-category | referral | Patient referral to specialist
			authoredOn	Automatically set to the date the CDS call is made
			performerType	-
			performer	-
			text.status	generated
			text.div	Refer to have specialist assessment and transthoracic echocardiography in 6 weeks
CARD 3
Summary			Review alternative causes for symptoms of HF in people with suspected heart failure (HF) and NT-proBNP levels below 400 ng/litre.
Detailed description			Review alternative causes for symptoms of HF in people with suspected heart failure (HF) and NT-proBNP levels below 400 ng/litre. If there is still concern that the symptoms might be related to HF, discuss with an expert physician in HF.
Source			Holistic patient-centred CAREPATH best practice guideline, Chapter 11.1 [pp. 37]
			Link to CarePATH best practice guideline
Suggestion 1
label	Consider a Referral to have specialist assessment.
ACTION 1	type	create
	description	Consider a Referral to specialist for reviewing alternative causes for symptoms of HF in people with suspected heart failure (HF) and NT-proBNP levels below 400 ng/litre.
	resource	Service Request	status	draft
			extension	http://kroniq.srdc.com.tr/fhir/StructureDefinition/title | Referral to a specialist
			intent	proposal
			occuranceDateTime	{{Today}}
			category	http://www.kroniq.srdc.com.tr/fhir/care-plan-activity-category | referral | Patient referral to specialist
			authoredOn	Automatically set to the date the CDS call is made
			performerType	-
			performer	-
			text.status	generated
			text.div	Refer to have specialist assessment
CARD 4
Summary			Assess severity, etiology, precipitating factors, type of cardiac dysfunction, and correctable causes.
Detailed description			When a diagnosis of HF has been made, assess severity, aetiology, precipitating factors, type of cardiac dysfunction, and correctable causes.
Source			Holistic patient-centred CAREPATH best practice guideline, Chapter 11.2.1 [pp. 37]
			Link to CarePATH best practice guideline
CARD 5
Summary			Perform transthoracic echocardiography.
Detailed description			When a diagnosis of HF has been made, perform transthoracic echocardiography to exclude valve disease, assess the systolic (and diastolic) function of the LV, and detect intracardiac shunts.
Source			Holistic patient-centred CAREPATH best practice guideline, Chapter 11.2.1 [pp. 37]
			Link to CarePATH best practice guideline
CARD 6
Summary			Perform NYHA classification (AICP) (New York Heart Association) to assess the severity of heart failure.
Detailed description			When a diagnosis of HF has been made, assess severity, aetiology, precipitating factors, type of cardiac dysfunction, and correctable causes.
Source			Holistic patient-centred CAREPATH best practice guideline, Chapter 11.2.1 [pp. 37]
			Link to CarePATH best practice guideline
CARD 7
Summary			Perform cardiac dysfunction classification by LVEF OR by entering LVEF measure.
Detailed description			When a diagnosis of HF has been made,perform transthoracic echocardiography to exclude valve disease, assess the systolic (and diastolic) function of the LV, and detect intracardiac shunts.
Source			Holistic patient-centred CAREPATH best practice guideline, Chapter 11.2.1 [pp. 37]
			Link to CarePATH best practice guideline
CARD 8
Summary			Offer self-management education for patients with HF and their caregivers.
Detailed description			Self-management education for patients with HF and their caregivers is recommended to decrease hospitalisation and mortality. It should commence soon after diagnosis, be patient-centred, appropriate to their level of health literacy, culturally appropriate, and revised throughout the person’s life.
Source			Holistic patient-centred CAREPATH best practice guideline, Chapter 11.2.1 [pp. 37]
			Link to CarePATH best practice guideline
Suggestion 1
label	Offer educational materials to Heart Failure patients.
ACTION 1	type	create
	description	Give self-management education materials for patients with HF and their caregivers
	resource	Communication Request	status	draft
			extension	http://kroniq.srdc.com.tr/fhir/StructureDefinition/title | Education material on self-management of heart failure
			subject	Patient
			authoredOn	Automatically set to the date the CDS call is made
			payload.contentAttachment.language	en
			payload.contentAttachment.url	https://www.nhsinform.scot/illnesses-and-conditions/heart-and-blood-vessels/conditions/heart-failure/
			payload.contentAttachment.title	Educational material on Heart failure
CARD 9
Summary			Diuretics should be routinely used for the relief of congestive symptoms and fluid retention in people with HF.
Detailed description			Diuretics should be routinely used for the relief of congestive symptoms and fluid retention in people with HF, and titrated (up and down) according to need following the initiation of subsequent heart failure therapies.
Source			Holistic patient-centred CAREPATH best practice guideline, Chapter 11.2.2 [pp. 37]
			Link to CarePATH best practice guideline
CARD 10
Summary			Low to medium dose of loop diuretics is recommended for people who have HF with preserved ejection fraction (HFpEF).
Detailed description			People who have HF with preserved ejection fraction (HFpEF) should be offered a low to medium dose of loop diuretics (for example, less than 80 mg furosemide per day).
Source			Holistic patient-centred CAREPATH best practice guideline, Chapter 11.2.2 [pp. 37]
			Link to CarePATH best practice guideline
CARD 11
Summary			Consider combination of a loop diuretic with thiazide-type diuretic in patients with resistant oedema who do not respond to an increase in loop diuretic doses.
Detailed description			Combination of a loop diuretic with thiazide-type diuretic should be considered in patients with resistant oedema who do not respond to an increase in loop diuretic doses.
Source			Holistic patient-centred CAREPATH best practice guideline, Chapter 11.2.2 [pp. 37]
			Link to CarePATH best practice guideline
CARD 12
Summary			Refer patient to a specialist for further advice if does not respond to treatment with combination of a loop diuretic and thiazide-type diuretics.
Detailed description			People whose HF does not respond to this treatment will need further specialist advice.
Source			Holistic patient-centred CAREPATH best practice guideline, Chapter 11.2.2 [pp. 38]
			Link to CarePATH best practice guideline
Suggestion 1
label	Consider a Referral to a specialist for further advice.
ACTION 1	type	create
	description	Consider a Referral to a specialist for further advice if the patient does not respond to treatment with combination of a loop diuretic and thiazide-type diuretics.
	resource	Service Request	status	draft
			extension	http://kroniq.srdc.com.tr/fhir/StructureDefinition/title | Referral to a specialist
			intent	proposal
			occuranceDateTime	{{Today}}
			category	http://www.kroniq.srdc.com.tr/fhir/care-plan-activity-category | referral | Patient referral to specialist
			authoredOn	Automatically set to the date the CDS call is made
			performerType	-
			performer	-
			text.status	generated
			text.div	Referral for further advice if the patient does not respond to treatment with combination of a loop diuretic and thiazide-type diuretics.
CARD 13
Summary			ACE inhibitors or ARB are recommended in patients with left ventricle systolic dysfunction.
Detailed description			ACE inhibitors or ARB are recommended in patients with left ventricle systolic dysfunction to decrease the risk of developing HF.
Source			Holistic patient-centred CAREPATH best practice guideline, Chapter 11.2.2 [pp. 38]
			Link to CarePATH best practice guideline
CARD 14
Summary			Measure serum sodium and potassium, and assess renal function.
Detailed description			Measure serum sodium and potassium, and assess renal function, before and 1 to 2 weeks after starting an ACE inhibitor/ARB, and after each dose increment.
Source			Holistic patient-centred CAREPATH best practice guideline, Chapter 11.2.2 [pp. 38]
			Link to CarePATH best practice guideline
Suggestion 1
label	Measure serum sodium and potassium, and assess renal function, before and 1 to 2 weeks after starting an ACE inhibitor/ARB, and after each dose increment.
ACTION 1	type	create
	description	Consider setting a follow-up appointment after 1-2 weeks for checking renal function
	resource	Appointment	extension	http://kroniq.srdc.com.tr/fhir/StructureDefinition/title | Follow-up appointment after 1-2 weeks for checking renal function
			description	Follow-up appointment after 1-2 weeks for checking renal function.
			status	proposed
			start	{{Today+2 weeks}}
			specialty	-
ACTION 2	type	create
	description	Consider ordering a serum creatinine test to assess renal function.
	resource	Service Request	status	draft
			extension	http://kroniq.srdc.com.tr/fhir/StructureDefinition/title | Serum creatinine test
			intent	proposal
			occuranceDateTime	{{Today+2 weeks}}
			category	http://www.kroniq.srdc.com.tr/fhir/care-plan-activity-category | lab-request | Lab Request
			code	LOINC | 2160-0 | Creatinine [Mass/volume] in Serum or Plasma
			performerType	-
			performer	Patient
			text.status	generated
			text.div	Have serum creatinine before the control visit
ACTION 3	type	create
	description	Consider ordering an eGFR test to assess renal function.
	resource	Service Request	status	draft
			extension	http://kroniq.srdc.com.tr/fhir/StructureDefinition/title | eGFR test
			intent	proposal
			occuranceDateTime	{{Today+2 weeks}}
			category	http://www.kroniq.srdc.com.tr/fhir/care-plan-activity-category | lab-request | Lab Request
			code	LOINC | 33914-3 | eGFR Test
			performerType	-
			performer	Patient
			text.status	generated
			text.div	Have eGFR measure before the control visit
ACTION 4	type	create
	description	Consider ordering a Potassium test
	resource	Service Request	status	draft
			extension	http://kroniq.srdc.com.tr/fhir/StructureDefinition/title | Potassium test
			intent	proposal
			occuranceDateTime	{{Today+2 weeks}}
			category	http://www.kroniq.srdc.com.tr/fhir/care-plan-activity-category | lab-request | Lab Request
			code	LOINC | 6298-4 | Potassium [Moles/volume] in Blood
			performerType	-
			performer	Patient
			text.status	generated
			text.div	Have Potassium measure before the control visit
ACTION 5	type	create
	description	Consider ordering a Sodium test
	resource	Service Request	status	draft
			extension	http://kroniq.srdc.com.tr/fhir/StructureDefinition/title | Sodium test
			intent	proposal
			occuranceDateTime	{{Today+2 weeks}}
			category	http://www.kroniq.srdc.com.tr/fhir/care-plan-activity-category | lab-request | Lab Request
			code	LOINC | 2947-0 | Sodium [Moles/volume] in Blood
			performerType	-
			performer	Patient
			text.status	generated
			text.div	Have Sodium measure before the control visit
CARD 15
Summary			Consider introducing beta-blockers in a “start low, go slow” manner in all patients with HFrEF associated with a moderate or severe reduction in LVEF (LVEF ≤40%). Assess heart rate and clinical status after each titration.
Detailed description			Introduce beta-blockers in all patients with HFrEF associated with a moderate or severe reduction in LVEF (LVEF ≤40%) unless contraindicated or not tolerated, and once stabilised with no or minimal clinical congestion on physical examination to decrease mortality and decrease hospitalisation.
Source			Holistic patient-centred CAREPATH best practice guideline, Chapter 11.2.2 [pp. 38]
			Link to CarePATH best practice guideline
CARD 16
Summary			Consider offering a Mineralocorticoid Receptor Antagonist, in addition to an ACE inhibitor (or ARB) and beta-blocker to people who have HF with reduced ejection fraction (HFrEF).
Detailed description			Offer a Mineralocorticoid Receptor Antagonist, in addition to an ACE inhibitor (or ARB) and beta-blocker, to people who have HF with reduced ejection fraction (HFrEF). Measure serum sodium and potassium, and assess renal function, before and after starting a Mineralocorticoid Receptor Antagonist and after each dose increment.
Source			Holistic patient-centred CAREPATH best practice guideline, Chapter 11.2.2 [pp. 38]
			Link to CarePATH best practice guideline
CARD 17
Summary			Measure serum sodium and potassium, and assess renal function, before and after starting a Mineralocorticoid Receptor Antagonist and after each dose increment.
Detailed description			Measure serum sodium and potassium (should be < 5.0 mEq/L), and assess renal function (eGFR should be >30 mL/min/1.73 m2), before and after starting a Mineralocorticoid Receptor Antagonist and after each dose increment.
Source			Holistic patient-centred CAREPATH best practice guideline, Chapter 11.2.2 [pp. 38]
			Link to CarePATH best practice guideline
Suggestion 1
label	Measure serum sodium and potassium, and assess renal function, before and after starting a Mineralocorticoid Receptor Antagonist and after each dose increment.
ACTION 1	type	create
	description	Consider setting a follow-up appointment after 1-2 weeks for checking renal function
	resource	Appointment	extension	http://kroniq.srdc.com.tr/fhir/StructureDefinition/title | Follow-up appointment after 1-2 weeks for checking renal function
			description	Follow-up appointment after 1-2 weeks for checking renal function.
			status	proposed
			start	{{Today+2 weeks}}
			specialty	-
ACTION 2	type	create
	description	Consider ordering a serum creatinine test to assess renal function.
	resource	Service Request	status	draft
			extension	http://kroniq.srdc.com.tr/fhir/StructureDefinition/title | Serum creatinine test
			intent	proposal
			occuranceDateTime	{{Today+2 weeks}}
			category	http://www.kroniq.srdc.com.tr/fhir/care-plan-activity-category | lab-request | Lab Request
			code	LOINC | 2160-0 | Creatinine [Mass/volume] in Serum or Plasma
			performerType	-
			performer	Patient
			text.status	generated
			text.div	Have serum creatinine before the control visit
ACTION 3	type	create
	description	Consider ordering an eGFR test to assess renal function.
	resource	Service Request	status	draft
			extension	http://kroniq.srdc.com.tr/fhir/StructureDefinition/title | eGFR test
			intent	proposal
			occuranceDateTime	{{Today+2 weeks}}
			category	http://www.kroniq.srdc.com.tr/fhir/care-plan-activity-category | lab-request | Lab Request
			code	LOINC | 33914-3 | eGFR Test
			performerType	-
			performer	Patient
			text.status	generated
			text.div	Have eGFR measure before the control visit
ACTION 4	type	create
	description	Consider ordering a Potassium test
	resource	Service Request	status	draft
			extension	http://kroniq.srdc.com.tr/fhir/StructureDefinition/title | Potassium test
			intent	proposal
			occuranceDateTime	{{Today+2 weeks}}
			category	http://www.kroniq.srdc.com.tr/fhir/care-plan-activity-category | lab-request | Lab Request
			code	LOINC | 6298-4 | Potassium [Moles/volume] in Blood
			performerType	-
			performer	Patient
			text.status	generated
			text.div	Have Potassium measure before the control visit
ACTION 5	type	create
	description	Consider ordering a Sodium test
	resource	Service Request	status	draft
			extension	http://kroniq.srdc.com.tr/fhir/StructureDefinition/title | Sodium test
			intent	proposal
			occuranceDateTime	{{Today+2 weeks}}
			category	http://www.kroniq.srdc.com.tr/fhir/care-plan-activity-category | lab-request | Lab Request
			code	LOINC | 2947-0 | Sodium [Moles/volume] in Blood
			performerType	-
			performer	Patient
			text.status	generated
			text.div	Have Sodium measure before the control visit
CARD 18
Summary			Consider prescribing SGLT2 inhibitors in patients with HFrEF or HFpEF.
Detailed description			SGLT2 inhibitors (dapagliflozin, empagliflozin, canagliflozin, and sotagliflozin) are recommended in patients with HFrEF or HFpEF irrespective of diabetes presence, to reduce hospitalisations for HF, major cardiovascular events, end-stage renal dysfunction, and cardiovascular death.
Source			Holistic patient-centred CAREPATH best practice guideline, Chapter 11.2.2 [pp. 38]
			Link to CarePATH best practice guideline
CARD 19
Summary			Consider prescribing OAC irrespective of the risk of stroke or CHA2DS2-VASc score, unless specific contraindication for OAC exists.
Detailed description			Every multimorbid older adult with mild cognitive impairment or mild dementia with non- valvular atrial fibrillation (NV-AF), benefits from OAC irrespective of the risk of stroke or CHA2DS2-VASc score, unless specific contraindication for OAC exists. In case of sinus rhythm, anticoagulation should be considered for those with a history of thromboembolism, LV aneurysm, or intracardiac thrombus. In…
Source			Holistic patient-centred CAREPATH best practice guideline, Chapter 11.2.2 [pp. 38]
			Link to CarePATH best practice guideline
CARD 20
Summary			Consider prescribing anticoagulation for those with a history of thromboembolism, LV aneurysm, or intracardiac thrombus.
Detailed description			Every multimorbid older adult with mild cognitive impairment or mild dementia with non- valvular atrial fibrillation (NV-AF), benefits from OAC irrespective of the risk of stroke or CHA2DS2-VASc score, unless specific contraindication for OAC exists. In case of sinus rhythm, anticoagulation should be considered for those with a history of thromboembolism, LV aneurysm, or intracardiac thrombus. In…
Source			Holistic patient-centred CAREPATH best practice guideline, Chapter 11.2.2 [pp. 38]
			Link to CarePATH best practice guideline
CARD 21
Summary			Consider prescribing AVK (e.g., Warfarin and Acenocoumarol) instead of DOACs in patients with moderate or severe mitral stenosis or mechanical prosthetic heart valves.
Detailed description			Every multimorbid older adult with mild cognitive impairment or mild dementia with non- valvular atrial fibrillation (NV-AF), benefits from OAC irrespective of the risk of stroke or CHA2DS2-VASc score, unless specific contraindication for OAC exists. In case of sinus rhythm, anticoagulation should be considered for those with a history of thromboembolism, LV aneurysm, or intracardiac thrombus. In…
Source			Holistic patient-centred CAREPATH best practice guideline, Chapter 11.2.2 [pp. 38]
			Link to CarePATH best practice guideline
CARD 22
Summary			Consider performing iron studies if patient with HFrEF has persistent symptoms despite optimised therapy.
Detailed description			In patients with HFrEF (LVEF <35%) associated with persistent symptoms despite optimised therapy, iron studies should be performed.
Source			Holistic patient-centred CAREPATH best practice guideline, Chapter 11.2.2 [pp. 39]
			Link to CarePATH best practice guideline
Suggestion 1
label	Perform iron studies.
ACTION 1	type	create
	description	Consider checking Ferritin
	resource	Service Request	status	draft
			extension	http://kroniq.srdc.com.tr/fhir/StructureDefinition/title | Ferritin test
			intent	proposal
			occuranceDateTime	{{Today+1 day}}
			category	http://www.kroniq.srdc.com.tr/fhir/care-plan-activity-category | lab-request | Lab Request
			code	LOINC | 2276-4 | Ferritin [Mass/volume] in Serum or Plasma
			performerType	-
			performer	Patient
			text.status	generated
			text.div	Have Ferritin before the control visit
ACTION 2	type	create
	description	Consider checking Iron saturation
	resource	Service Request	status	draft
			extension	http://kroniq.srdc.com.tr/fhir/StructureDefinition/title | Iron saturation test
			intent	proposal
			occuranceDateTime	{{Today+1 day}}
			category	http://www.kroniq.srdc.com.tr/fhir/care-plan-activity-category | lab-request | Lab Request
			code	LOINC | 86913-1| Iron saturation goal Serum or Plasma
			performerType	-
			performer	Patient
			text.status	generated
			text.div	Have Iron saturation measurement before the control visit
ACTION 3	type	create
	description	Consider setting a follow appointment for checking iron studies
	resource	Appointment	extension	http://kroniq.srdc.com.tr/fhir/StructureDefinition/title | Follow-up appointment for checking iron studies
			description	Follow-up appointment for checking iron studies
			status	proposed
			start	{{Today+1 day}}
			specialty	-
CARD 23
Summary			Consider treatment with intravenous ferric carboxymaltose if the patient is iron deficient.
Detailed description			If the patient is iron deficient (ferritin <100 mcg/L or transferrin saturation <20%), treatment with intravenous ferric carboxymaltose should be considered.
Source			Holistic patient-centred CAREPATH best practice guideline, Chapter 11.2.2 [pp. 39]
			Link to CarePATH best practice guideline
CARD 24
Summary			Monitor the response to titration closely.
Detailed description			Monitor the response to titration of medicines closely in people who have HF and Chronic Kidney Disease (CKD), considering the increased risk of hyperkalaemia.
Source			Holistic patient-centred CAREPATH best practice guideline, Chapter 11.2.2 [pp. 39]
			Link to CarePATH best practice guideline
CARD 25
Summary			Consider liaising with a renal physician.
Detailed description			For people who have HF and CKD with an eGFR below 30 ml/min/1.73 m2, consider liaising with a renal physician.
Source			Holistic patient-centred CAREPATH best practice guideline, Chapter 11.2.2 [pp. 39]
			Link to CarePATH best practice guideline
Suggestion 1
label	Consider liaising with a renal physician.
ACTION 3	type	create
	description	Consider a Referral to renal physician.
	resource	Service Request	status	draft
			extension	http://kroniq.srdc.com.tr/fhir/StructureDefinition/title | Referral to a physician
			intent	proposal
			occuranceDateTime	{{Today}}
			category	http://www.kroniq.srdc.com.tr/fhir/care-plan-activity-category | referral | Patient referral to specialist
			authoredOn	Automatically set to the date the CDS call is made
			performerType	SNOMED | 11911009 | Nephrologist
			performer	-
			text.status	generated
			text.div	Referral to renal physician
Autofill CDS cards
CARD 26
Summary			Consider Iron deficiency diagnosis since ferritin value of the patient is less than 100 mcg/L (ng/mL).
Detailed description			Consider Iron deficiency diagnosis since ferritin value of the patient is less than 100 mcg/L (ng/mL).
Source			Holistic patient-centred CAREPATH best practice guideline, Chapter 11.2.2 [pp. 39]
			Link to CarePATH best practice guideline
CARD 27
Summary			Consider Iron deficiency diagnosis since iron saturation value of the patient is less than 20%.
Detailed description			Consider Iron deficiency diagnosis since iron saturation value of the patient is less than 20%.
Source			Holistic patient-centred CAREPATH best practice guideline, Chapter 11.2.2 [pp. 39]
			Link to CarePATH best practice guideline
CARD 28
Summary			Consider HF with reduced ejection fraction (HFrEF) diagnosis since LV ejection fraction value of the patient is less than 35%.
Detailed description			Consider HF with reduced ejection fraction (HFrEF) diagnosis since LV ejection fraction value of the patient is less than 35%.
Source			Holistic patient-centred CAREPATH best practice guideline, Chapter 11.2.2 [pp. 39]
			Link to CarePATH best practice guideline
CARD 29
Summary			Consider severe LV dysfunction since LV ejection fraction value of the patient is less than 40%.
Detailed description			Consider severe LV dysfunction since LV ejection fraction value of the patient is less than 40%.
Source			Holistic patient-centred CAREPATH best practice guideline, Chapter 11.2.2 [pp. 38]
			Link to CarePATH best practice guideline
CARD 30
Summary			Consider HF with mildly reduced ejection fraction diagnosis since LV ejection fraction value of the patient is between 35-49%.
Detailed description			Consider HF with mildly reduced ejection fraction diagnosis since LV ejection fraction value of the patient is between 35-49%.
Source			Holistic patient-centred CAREPATH best practice guideline, Chapter 11.2.2 [pp. 39]
			Link to CarePATH best practice guideline
CARD 31
Summary			Consider HF with preserved ejection fraction (HFpEF) diagnosis since LV ejection fraction value of the patient is greater than 50%.
Detailed description			Consider HF with preserved ejection fraction (HFpEF) diagnosis since LV ejection fraction value of the patient is greater than 50%.
Source			Holistic patient-centred CAREPATH best practice guideline, Chapter 11.2.2 [pp. 39]
			Link to CarePATH best practice guideline
